# Supplementary material for: Associations and interactions between variants in selenoprotein genes, selenoprotein levels and the development of abdominal aortic aneurysm, peripheral arterial disease, and heart failure
Source: PLoS One. 2018 Sep 6;13(9):e0203350. doi: 10.1371/journal.pone.0203350 (PMC6126836; doi:10.1371/journal.pone.0203350)
Supplement: S7 Table — (XLSX) [file pone.0203350.s007.xlsx]

## Sheet: Genotype data
LP	Sample ID	Male sex	Age	Diagnosis	AAA with concomitant PAD	SEPP1 rs3877899G>A	SEPP1 rs7579G>A	SELENOS rs34713741C>T	TXNRD1 rs35009941C>G	TXNRD2 rs9605031C>T	GPX4 rs713041C>T	SOD2 rs4880C>T
334	AAA500	1	75	AAA	1	0	0	1	0	1	0	1
335	AAA502	1	66	AAA	1	0	1	0	0	0	2	0
336	AAA503	1	75	AAA	1	1	0	2	0	0	1	1
337	AAA504	1	63	AAA	1	0	1	0	0	0	2	0
338	AAA505	1	65	AAA	1	1	1	2	0	1	0	1
339	AAA506	1	69	AAA		1	0	0	0	0	1	2
340	AAA507	1	62	AAA	0	0	1	1	0	1	1	1
341	AAA508	1	62	AAA	1	0	1	0	0	1	2	1
342	AAA509	1	69	AAA	1	0	1	1	0	1	1	1
343	AAA510	1	67	AAA	1	1	0	1	0	1	2	1
344	AAA511	1	62	AAA	1	0	1	0	0	0	0	0
345	AAA513	1	51	AAA	1	1	0	1	0	0	0	1
346	AAA514	1	65	AAA	1	1	1	0	0	1	0	2
347	AAA515	1	59	AAA	1	1	0	0	0	0	2	2
348	AAA516	1	64	AAA	1	0	1	2	0	0	1	1
349	AAA517	1	77	AAA	0	1	0	2	0	1	1	1
352	AAA520	1	56	AAA	0	1	1	0	0	1	2	1
353	AAA521	1	76	AAA	1	0	1	1	0	0	0	1
354	AAA522	1	59	AAA	1	0	1	1	0	0	0	1
356	AAA524	1	55	AAA	1	0	1	2	0	0	1	2
358	AAA526	1	80	AAA	1	1	0	2	0	1	1	2
359	AAA527	1	74	AAA	1	1	0	1	0	1	0	0
360	AAA528	1	74	AAA	0	2	0	0	0	0	0	0
361	AAA529	1	73	AAA	1	1	1	1	0	0	0	1
362	AAA530	0	55	AAA	1	2	0	0	0	1	1	1
363	AAA531	1	60	AAA	0	1		1	0	1
364	AAA532	1	66	AAA	1	1	0	1	0	0	0	1
365	AAA533	1	62	AAA	1	0	0	0	0	1	1	2
366	AAA535	1	62	AAA	1	1	0	0	0	0	0	1
367	AAA536	1	50	AAA	1	0	1	1	0	0	0	0
368	AAA537	1	74	AAA	1	0	2	1	0	0	2	1
369	AAA538	1	63	AAA	1	1	0	0	0	0	2	0
370	AAA539	1	61	AAA	0	1	1	0	0	0	1	1
371	AAA540	1	54	AAA	1	0	1	1	0	0	0	1
372	AAA541	1	66	AAA	1	1	0	1	0	0	0	1
373	AAA542	1	70	AAA	1	2	0	0	0	1	1	1
374	AAA543	1	65	AAA	1	1	1	0	0	2	0	2
375	AAA544	1	54	AAA	0	1	1	1	0	0	1	0
376	AAA545	1	68	AAA	1	0	1	0	0	0	2	1
377	AAA546	1	77	AAA	1	2	0	1	0	0	1	1
378	SL602	0	62	AAA	1	0	0	0	0	1	0	2
379	SL606	1	62	AAA	1	1	0	0	0	0	0	0
380	AAA332	1	70	AAA	1	2	0	0	0	0	1	0
381	AAA333	1	58	AAA	1	0	2	0	0	1	0	1
382	AAA001	1	79	AAA	1	1	1	0	0	0	2	0
383	AAA002	1	70	AAA	1	1	0	1	0	0	1	1
384	AAA003	1	54	AAA	1	0	0	0	0	0	1	1
385	AAA004	1	72	AAA	0	0	1	0	0	1	1	1
386	AAA005	1	81	AAA	1	0	1	1	0	0	1	0
387	AAA006	1	72	AAA	1	0	0	1	0	0	1	1
388	AAA007	1	61	AAA	1	0	1	0	0	0	0	1
389	AAA008	1	64	AAA	0	0	2	0	0	1	1	0
390	AAA009	1	67	AAA	0	0	1	0	0	1	0	1
391	AAA010	0	55	AAA	1	0	0	0	0	0	0	1
392	AAA011	0	55	AAA	1	1	0	0	0	0	1	2
393	AAA013	1	75	AAA	0	0	1	1	0	0	1	1
394	AAA014	1	69	AAA	1	1	1	1	0	1	1	1
395	AAA018	1	72	AAA	1	1	1	0	0	0	1	0
396	AAA019	1	77	AAA	0	1	1	0	0	0	1	2
397	AAA020	1	67	AAA	0	0	1	1	0	0	1	2
398	SL636	1	54	AAA	1	1	1	1	0	1	1	2
399	AAA021	1	71	AAA	0	0	0	2	0	0	1	1
400	NT323	1	55	AAA	0	0	1	1	0	0	1	1
401	AAA022	1	61	AAA	0	0	1	0	0	0	0	0
402	AAA023	0	74	AAA		1	0	1	0	1	2	1
403	AAA024	1	79	AAA	0	1	0	1	0	1	0	2
404	AAA025	1	67	AAA	1	1	1	1	0	0	2	1
405	AAA026	1	76	AAA	1	1	1	1	0	1	1	2
406	AAA027	1	63	AAA	0	1	1	1	0	0	1	1
407	AAA028	0	73	AAA	0	0	1	2	0	1	0	2
408	AAA029	1	69	AAA	1	1	1	1	0	0	0	0
409	AAA030	0	74	AAA	0	1	0	0	0	2	2	0
410	AAA031	1	77	AAA	1	2	0	0	0	2	0	1
411	AAA032	1	78	AAA	1	0	2	1	0	1	0	1
412	AAA033	1	68	AAA	0	0	0	1	0	0	0	2
413	AAA034	0	71	AAA	1	0	1	2	0	1	1	1
414	AAA035	1	74	AAA	1	1	1	0	0	1	1	2
415	AAA036	0	70	AAA	0	0	2	1	0	0	2	0
416	AAA037	0	75	AAA	1	0	2	0	0	0	1	2
417	AAA038	1	79	AAA	1	0	1	1	0	1	0	1
418	AAA039	1	74	AAA	0	0	1	1	0	0	1	1
419	AAA040	1	67	AAA	1	0	0	0	0	1	2	1
420	AAA041	1	60	AAA	1	0	1	1	0	0	1	0
421	AAA042	1	69	AAA	1	1	0	0	0	0	1	2
422	AAA043	0	76	AAA	1	0	0	0	0	0	1	1
423	AAA044	1	66	AAA	1	0	0	2	0	0	1	1
424	AAA045	1	75	AAA	1	0	0	0	0	0	1	0
425	AAA046	0	63	AAA	1	0	0	0	0	1	1	0
426	AAA047	1	67	AAA	0	0	0	0	0	1	1	1
427	AAA048	1	71	AAA	0	1	0	1	0	1	0	1
428	AAA049	1	73	AAA	0	0	2	0	0	0	1	2
429	AAA050	1	72	AAA	1	0	1	1	0	1	1	0
430	AAA051	0	58	AAA	0	1	0	0	0	0	1	1
431	AAA052	1	69	AAA	1	0	2	1	0	0	0	2
432	AAA053	1	56	AAA	1	1	0	0	0	0	1	1
433	AAA054	1	54	AAA	0	0	1	2	0	0	0	1
434	AAA055	0	73	AAA	1	1	0	0	0	1	1	1
435	AAA056	0	66	AAA	0	2	0	0	0	0	0	0
436	AAA057	1	75	AAA	0	0	0	0	0	1	2	2
437	AAA058	1	67	AAA	1	1	0	1	0	0	1	2
438	AAA059	1	65	AAA	0	0	0	0	0	1	1	2
439	AAA060	1	74	AAA	0	0	1	0	0	1	1	1
440	AAA061	1	70	AAA	0	0	1	0	0	1	0	2
441	AAA062	1	64	AAA	1	0	1	1	0	0	1	0
442	AAA063	1	78	AAA	1	1	1	1	0	0	1	1
443	AAA064	1	74	AAA	0	1	0	0	0	0	1	2
444	AAA065	1	67	AAA	0	2	0	0	0	2	1	2
445	AAA066	1	71	AAA	1	0	2	1	0	0	0	0
447	AAA068	1	63	AAA	1	0	0	1	0	0	1	0
448	AAA069	1	71	AAA	1	0	1	0	0	2	1	1
449	AAA070	1	65	AAA	0	0	1	0	0	1	1	1
450	AAA071	0	55	AAA	1	0	1	2	0	1	1	0
451	AAA072	1	59	AAA	1	0	0	0	0	1	1	2
452	AAA0073	1	58	AAA	0	0	0	0	0	0	0	0
453	AAA0074	0	66	AAA	0	1	0	0	0	1	1	1
454	AAA075	1	82	AAA	0	0	0	0	0	1	0	1
455	AAA076	1	69	AAA	1	1	0	0	0	1	2	0
456	AAA077	1	74	AAA	0	0	1	0	0	2	0	0
457	AAA078	1	80	AAA	1	0	2	0	0	0	2	2
458	AAA079	1	56	AAA	1	0	0	1	0	1	1	1
459	AAA080	1	69	AAA	1	1	0	1	0	0	1	1
460	AAA081	1	72	AAA	0	0	1	0	0	0	1	2
461	AAA082	1	62	AAA	1	0	0	0	0	0	2	1
462	AAA083	1	57	AAA	0	0	1	0	0	2	1	1
463	AAA084	1	77	AAA	0	0	1	0	0	1	1	2
465	AAA086	1	58	AAA	1	0	1	1	0	1	0	1
466	AAA087	1	60	AAA	1	0	2	1	0	1	0	2
467	AAA088	1	60	AAA	0	1	1	0	0	0	2	1
468	AAA089	1	69	AAA	1	0	0	0	0	0	1	0
469	AAA090	1	77	AAA	1	0	0	2	0	1	1	1
470	AAA091	1	73	AAA	1	1	0	1	0	0	2	0
471	AAA092	0	79	AAA		0	0	0	0	0	1	2
472	AAA093	0	60	AAA	0	0	0	2	0	1	1	0
473	AAA094	1	70	AAA	1	1	0	0	0	0	2	1
474	AAA095	1	63	AAA	0	0	1	1	0	1	0	0
475	AAA096	1	75	AAA	1	1	1	1	0	0	2	0
476	AAA097	1	68	AAA	0	1	0	0	0	0	2	1
477	AAA098	1	70	AAA	1	1	0	1	0	1	2	1
478	AAA100	1	77	AAA	0	0	2	0	0	0	1	1
480	AAA103	1	70	AAA	1	1	0	1	0	0	1	1
481	AAA104	1	74	AAA	0	1	0	1	0	0	1	0
482	AAA105	0	59	AAA	0	0	0	1	0	0	1	1
483	AAA106	1	67	AAA	0	0	1	0	0	0	2	0
484	AAA107	1	53	AAA		0	0	1	0	0	1	2
485	AAA108	1	60	AAA	0	0	0	2	0	0	1	2
486	AAA109	1	49	AAA	0	0	1	0	0	1	1	1
487	AAA110	0	85	AAA	0	0	0	0	0	1	0	1
488	AAA111	1	58	AAA	0	0	0	0	0	1	1	2
489	AAA114	0	67	AAA	1	0	1	1	0	1	1	0
490	AAA116	1	63	AAA	1	1	0	0	0	1	1	0
491	AAA117	1	59	AAA		0	1	1	0	0	1	1
492	AAA118	1	75	AAA		0	1	0	0	0	0	2
493	AAA119	1	67	AAA	0	2	0	1	0	1	2	0
494	AAA120	1	64	AAA		0	1	1	0	1	1	1
495	AAA121	1	63	AAA	0	0	0	1	0	0	0	1
496	AAA122	1	62	AAA	1	1	0	0	0	0	1	0
497	AAA123	1	60	AAA	0	0	1	1	0	1	1	1
498	AAA124	1	67	AAA	1	0	1	1	0	1	1	1
499	AAA125	1	56	AAA	0	0	1	1	0	0	0	0
500	AAA126	1	72	AAA	1	1	0	2	0	0	2	1
501	AAA127	1	66	AAA	1	1	1	0	0	1	0	1
502	AAA128	0	76	AAA	1	0	1	0	0	1	1	2
503	AAA129	1	79	AAA	0	0	1	1	0	0	0	1
504	AAA131	1	61	AAA	1	0	0	0	0	0	1	2
505	AAA132	0	54	AAA	0	1	1	1	0	2	2	0
506	AAA133	0	68	AAA	0	0	0	0	0	1	1	2
507	AAA134	1	77	AAA	0	1	0	0	0	1	2	0
508	AAA136	1	57	AAA	0	0	1	0	0	0	1	2
509	AAA137	1	74	AAA	1	1	1	0	0	0	0	0
510	AAA138	0	68	AAA	1	0	1	2	0	0	1	0
511	AAA139	1	85	AAA	1	0	1	1	0	0	0	1
512	AAA141	1	57	AAA	0	0	1	1	0	1	0	1
513	AAA142	1	80	AAA	1	1	1	0	0	1	1	1
514	AAA145	1	71	AAA	1	1	0	2	0	0	0	0
515	AAA146	1	66	AAA	0	0	0	0	0	0	1	0
516	AAA147	1	57	AAA	0	0	0	1	0	0	0	1
517	AAA148	1	81	AAA	1	0	1	1	0	2	0	2
518	AAA150	1	79	AAA	1	1	0	0	0	0	0	0
519	AAA151	1	65	AAA	0	0	2	1	0	1	1	1
520	AAA152	1	76	AAA	0	0	1	1	0	0	2	0
521	AAA153	1	74	AAA	1	0	1	1	0	1	0	0
522	AAA154	1	58	AAA	0	0	1	0	0	1	1	0
523	AAA155	0	65	AAA	0	0	1	0	0	2	0	1
524	AAA156	1	62	AAA	1	2	0	0	0	0	1	0
525	AAA159	0	85	AAA	1	1	0	0	0	0	1	1
526	AAA160	1	73	AAA	1	0	0	1	0	0	1	0
527	AAA162	1	75	AAA	1	0	1	0	0	0	0	1
528	AAA163	0	94	AAA	1	0	1	1	0	0	1	0
529	AAA164	0	56	AAA	1	1	0	0	0	0	2	2
530	AAA165	1	68	AAA	1	0	1	0	0	0	1	1
531	AAA166	1	75	AAA	0	0	0	0	0	0	1	1
532	AAA167	1	80	AAA	0	1	1	1	0	1	1	0
533	AAA168	1	69	AAA	1	1	0	0	0	0	1	1
534	AAA169	1	61	AAA	0	1	1	2	0	1	0	0
535	AAA170	1	71	AAA	1	0	1	2	0	0	1	2
536	AAA171	0	83	AAA	1	1	0	1	0	2	1	1
537	AAA173	1	63	AAA	1	1	0	1	0	1	1	1
538	AAA174	1	65	AAA	1	0	0	1	0	1	1	2
539	AAA175	0	79	AAA	1	1	0	0	0	0	1	0
540	AAA176	1	72	AAA	0	0	0	1	0	1	0	1
541	AAA177	1	70	AAA	1	0	0	0	0	2	0	2
542	AAA178	0	72	AAA	0	0	2	2	0	0	1	1
543	AAA179	1	59	AAA	0	0	1	0	0	0	1	1
544	AAA180	0	61	AAA	0	0	1	1	0	0	1	0
545	AAA181	1	83	AAA	1	1	0	1	0	1	1	1
546	AAA182	1	76	AAA	1	0	1	0	0	1	2	0
547	AAA183	1	75	AAA	0	1	1	1	0	0	1	1
548	AAA184	1	66	AAA	0	0	0	2	0	1	0	0
549	AAA185	1	72	AAA	0	1	1	1	0	0	0	1
550	AAA187	1	64	AAA	1	0	1	1	0	0	0	0
551	AAA188	1	69	AAA	1	0	2	1	0	1	1	1
552	AAA189	1	68	AAA	1	1	0	0	0	2	0	0
553	AAA190	1	70	AAA	1	1	1	1	0	1	0	2
554	AAA191	1	76	AAA	1	0	1	0	0	1	2	0
555	AAA192	1	58	AAA	1	0	1	1	0	1	1	1
556	AAA193	1	52	AAA	1	2	0	1	0	1	1	1
557	AAA194	1	74	AAA	0	0	2	1	0	2	0	2
558	AAA195	1	70	AAA	1	1	1	1	0	1	1	0
559	AAA196	1	60	AAA	0	0	0	1	0	0	1	2
560	AAA197	0	79	AAA	0	0	1	1	0	1	0	0
561	AAA19	1	64	AAA	1	1	1	0	0	0	1	1
562	AAA199	1	56	AAA	1	0	0	0	0	0	0	1
563	AAA200	1	58	AAA	1	0	1	1	0	0	1	0
564	AAA201	1	68	AAA	0	0	2	0	0	1	1	1
565	AAA202	0	61	AAA	1	0	0	0	0	0	1	1
566	AAA203	0	68	AAA	1	0	0	2	0	1	2	0
567	AAA204	1	71	AAA	0	0	1	1	0	1	1	2
568	AAA205	1	72	AAA	1	1	0	2	0	1	1	2
569	AAA206	1	58	AAA	0	1	0	1	0	1	1	0
570	AAA207	1	63	AAA		2	0	2	0	1	2	1
571	AAA208	1	81	AAA	1	0	1	1	0	0	1	1
572	AAA209	1	50	AAA	0	2	0	1	0	1	1	0
573	AAA210	0	73	AAA	0	0	1	1	0	0	1	0
574	AAA211	1	82	AAA	0	1	0	0	0	1	1	2
576	SL140	1	57	AAA	1	0	0	0	0	0	0	1
577	AAA214	1	76	AAA	0	0	1	1	0	2	0	0
578	AAA215	1	82	AAA	0	0	0	0	0	1	0	1
579	AAA216	1	53	AAA	1	1	0	0	0	2	1	1
580	AAA217	1	70	AAA		0	1	2	0	1	0	0
581	AAA218	1	70	AAA	1	0	2	0	0	2	2	1
582	AAA219	0	68	AAA	0	1	1	0	0	1	0	1
583	AAA220	0	76	AAA	0	0	0	0	0	1	1	2
584	AAA221	1	78	AAA		1	0	1	0	0	0	1
585	AAA222	1	82	AAA	0	0	1	1	0	2	1	0
586	AAA223	1	72	AAA	0	0	1	0	0	1	1	1
587	AAA224	1	82	AAA	0	0	0	0	0	1	1	0
588	AAA225	1	64	AAA	0	0	0	1	0	0	1	0
589	AAA226	1	58	AAA	0	0	0	2	0	0	1	2
590	AAA227	0	73	AAA	1	0	0	1	0	1	1	1
591	AAA228	1	63	AAA	0	0	1	0	0	0	0	1
592	AAA230	1	58	AAA	0	2	0	0	0	2	0	2
593	AAA231	1	73	AAA	0	0	1	1	0	0	1	1
594	AAA232	1	73	AAA	1	1	1	1	0	1	0	0
595	AAA233	1	61	AAA	0	0	0	1	0	0	0	1
596	AAA234	1	64	AAA	0	1	1	1	0	0	1	2
597	AAA235	1	75	AAA	0	0	2	1	0	0	0	2
598	AAA236	1	84	AAA	0	1	0	0	0	0	0	0
599	AAA237	1	70	AAA		0	0	1	0	0	1	2
600	AAA238	1	76	AAA	0	0	0	1	0	1	2	2
601	AAA239	1	59	AAA	1	1	1	1	0	0	0	1
602	AAA240	1	79	AAA		0	1	1	0	0	2	0
603	AAA241	1	69	AAA	0	0	1	1	0	1	1	0
604	AAA242	1	75	AAA	0	0	2	0	0	1	2	1
605	AAA243	1	73	AAA		0	1	0	0	1	0	1
606	AAA244	1	75	AAA	0	0	1	0	0	1	0	1
607	AAA245	1	74	AAA	0	1	1	0	0	0	0	0
608	AAA246	1	67	AAA	0	2	0	1	0	0	1	0
609	AAA247	1	75	AAA	0	1	0	1	0	2	0	1
610	AAA248	1	72	AAA	0	0	1	1	0	1	0	1
611	AAA249	1	76	AAA	0	0	0	0	0	1	2	1
612	AAA250	1	78	AAA	0	1	1	0	0	0	2	1
613	AAA251	1	76	AAA	0	1	0	0	0	1	1	0
614	AAA252	0	85	AAA	0	1	0	2	0	0	1	1
615	AAA253	1	61	AAA	0	1	1	2	0	0	1	2
616	AAA254	1	70	AAA	0	1	0	0	0	0	0	1
617	AAA255	1	60	AAA		0	2	0	0	0	0	1
618	AAA256	1	62	AAA	0	1	1	0	0	1	1	2
619	AAA257	0	89	AAA	0	1	1	1	0	0	0	1
620	AAA258	1	83	AAA	0	1	1	2	0	2	0	1
621	AAA259	1	55	AAA	0	0	1	2	0	0	1	2
622	AAA260	1	64	AAA	0	0	1	2	0	1	0	1
623	AAA261	1	58	AAA	1	0	2	0	0	2	1	1
624	AAA262	1	68	AAA	0	0	1	0	0	0	1	2
625	AAA263	1	61	AAA	1	1	0	1	0	0	1	0
627	AAA265	1	57	AAA	0	0	0	1	0	0	1	2
628	AAA266	1	79	AAA	0	0	1	1	0	0	0	2
629	AAA267	1	72	AAA	0	1	1	0	0	0	0	1
630	AAA268	1	62	AAA	1	1	1	0	0	1	1	1
631	AAA269	1	78	AAA	1	1	0	1	0	0	1	2
632	AAA270	0	73	AAA	0	1	1	0	0	0	0	1
633	AAA271	1	66	AAA	1	0	0	1	0	0	0	1
634	AAA272	1	80	AAA	0	0	1	1	0	0	1	1
636	AAA274	1	69	AAA	0	1	1	0	0	1	1	0
637	AAA275	1	59	AAA	0	1	0	1	0	0	2	2
638	AAA276	1	77	AAA	0	0	0	0	0	1	0	1
639	AAA277	1	82	AAA	1	1	1	0	0	0	1	1
640	AAA278	1	52	AAA	0	0	0	0	0	1	1	1
641	AAA279	1	76	AAA	0	0	1	1	0	0	0	1
642	AAA280	1	80	AAA	1	1	1	2	0	1	1	0
643	AAA281	1	71	AAA	0	0	1	1	0	1	1	0
644	AAA282	0	73	AAA	1	0	1	0	0	0	1	0
645	AAA283	0	70	AAA	0	0	2	0	0	1	0	1
646	AAA284	1	60	AAA		0	0	1	0	1	0	1
647	AAA285	1	80	AAA	0	0	1	2	0	1	1	0
648	AAA286	0	69	AAA	0	0	1	0	0	0	1	1
649	AAA287	1	69	AAA	1	0	1	0	0	0	1	1
650	AAA288	1	61	AAA	0	0	1	0	0	0	0	1
651	AAA289	0	80	AAA	1	0	0	0	0	0	0	1
652	AAA290	1	68	AAA	0	0	1	0	0	0	1	1
653	AAA291	1	74	AAA	0	1	1	2	0	1	1	1
655	AAA293	1	71	AAA	0	0	0	1	0	1	1	1
656	AAA294	1	81	AAA	1	0	1	1	0	0	1	2
658	AAA296	1	76	AAA	1	0	0	2	0	0	0	1
659	AAA297	0	84	AAA	0	0	1	0	0	1	0	1
660	AAA298	1	67	AAA	0	0	0	2	0	1	0	0
661	AAA299	1	75	AAA	0	0	2	1	0	0	1	2
662	AAA300	1	59	AAA	0	1	0	0	0	1	1	0
663	AAA301	1	61	AAA	0	0	0	0	0	0	1	2
664	AAA302	1	73	AAA	1	0	1	1	0	1	0	0
665	AAA303	1	53	AAA	1	0	1	1	0	0	0	2
666	AAA304	1	68	AAA	0	1	0	0	0	1	1	0
667	AAA305	1	73	AAA	0	1	0	1	0	0	0	0
668	AAA306	1	74	AAA	0	1	1	0	0	0	0	0
669	AAA307	1	62	AAA	0	0	1	0	0	1	1	2
670	AAA308	1	76	AAA	0	1	1	0	0	0	0	2
671	AAA309	0	81	AAA	0	0	1	1	0	0	0	2
672	AAA310	0	72	AAA	0	1	0	0	0	1	0	1
673	AAA311	1	75	AAA	0	0	2	1	0	0	0	2
674	AAA312	1	70	AAA	0	0	0	2	0	1	2	2
675	AAA313	1	71	AAA	1	0	1	1	0	0	1	2
676	AAA314	1	75	AAA	0	0	2	0	0	0	0	2
677	AAA315	1	70	AAA	0	0	0	1	0	1	2	1
678	AAA316	1	84	AAA	0	1	0	1	0	1	1	1
679	AAA317	1	83	AAA	1	0	0	0	0	2	1	1
680	AAA318	1	79	AAA	0	0	0	0	0	0	0	0
681	AAA319	1	61	AAA	1	0	2	0	0	0	1	1
682	AAA320	1	86	AAA	0	0	2	1	0	0	0	1
683	AAA321	1	62	AAA	0	2	0	1	0	0	1	1
684	AAA322	1	62	AAA	0	0	1	1	0	1	0	1
686	AAA324	1	79	AAA	0	0	1	0	0	0	0	1
687	AAA325	1	63	AAA	0	1	1	0	0	0	1	1
688	AAA326	1	61	AAA	0	1	0	1	0	1	2	2
689	AAA327	1	62	AAA	1	0	1	0	0	0	2	1
690	AAA328	1	66	AAA	0	1	0	0	0	1	2	1
691	AAA329	1	76	AAA	1	0	0	1	0	1	0	1
692	AAA330	1	72	AAA	1	0	0	1	0	0	2	1
693	AAA331	1	66	AAA	1	0	1	0	0	0	1	1
694	AAA334	1	70	AAA	1	1	0	0	0	2	0	2
695	AAA335	1	60	AAA	0	0	0	0	0	0	0	2
696	AAA336	1	81	AAA	1	1	1	1	0	2	0	2
697	AAA337	1	77	AAA	0	0	1	1	0	1	0	1
698	AAA338	0	78	AAA	0	1	0	0	0	1	0	2
699	AAA339	1	74	AAA	1	1	0	0	0	1	1	1
701	AAA341	1	65	AAA	0	1	0	1	0	0	1	2
702	AAA342	1	73	AAA	1	1	0	0	0	0	0	2
703	AAA343	0	66	AAA	1	2	0	0	0	1	0	0
704	AAA344	1	76	AAA	0	0	0	1	0	0	2	0
705	AAA345	1	59	AAA	1	0	1	1	0	1	2	2
706	AAA346	1	73	AAA	0	0	1	0	0	1	2	1
707	AAA347	1	73	AAA	0	0	1	1	0	1	2	0
709	AAA349	1	56	AAA	0	0	1	1	0	0	2	2
710	AAA350	1	76	AAA	0	0	0	2	0	1	0	1
711	AAA351	1	72	AAA	1	1	0	0	0	0	1	1
713	AAA353	1	73	AAA	1		0	0	0	0	1	2
714	AAA354	1	72	AAA	0	1	0	0	0	1	1	1
715	AAA355	1	63	AAA	1	0	2	2	0	0	0	1
716	AAA356	1	68	AAA	1	0	1	0	0	0	1	1
717	AAA357	1	62	AAA	0	0	0	0	0	1	0	0
718	AAA358	1	71	AAA	0	0	0	0	0	0	1	0
719	AAA359	1	78	AAA	1	0	1	1	0	1	1	1
720	AAA360	1	58	AAA	1		1	0	0	1	0
721	AAA361	0	59	AAA	1	0	2	1	0	0	1	1
723	AAA363	1	82	AAA	0	0	2	2	0	0	2	2
724	AAA364	1	57	AAA	1	1	0	0	0	0	1	1
725	AAA365	1	81	AAA	1	0	1	1	0	2	0	0
726	AAA366	1	59	AAA	1	0	2	0	0	1	0	0
727	AAA367	0	63	AAA	1	0	1	1	0	0	1	1
728	AAA368	1	70	AAA	1	0	1	0	0	1	1	2
729	AAA369	1	60	AAA	1	1	0	1	0	1	1	1
730	AAA370	1	83	AAA		0	0	1	0	0	1	2
731	AAA371	1	69	AAA	1	2	0	0	0	1	1	0
732	AAA372	1	69	AAA	0	0	1	0	0	1	1	2
733	AAA373	0	66	AAA	1	0	1	1	0	1	2	1
734	AAA374	1	63	AAA	1	0	2	1	0	0	1	1
735	AAA375	1	71	AAA	1	1	1	1	0	1	1	2
736	AAA376	1	77	AAA	1	0	0	0	0	0	1	0
737	AAA377	1	73	AAA	0	0	0	0	0	1	0	0
738	AAA378	1	67	AAA	1	1	0	0	0	1	1	2
739	AAA379	1	73	AAA		0	1	1	0	1	2	0
740	AAA380	1	73	AAA		1	0	2	0	0	1	0
741	AAA381	0	69	AAA		0	0	1	0	0	0	1
742	AAA382	1	69	AAA		0	0	0	0	0	1	0
743	AAA383	1	58	AAA		1	1	2	0	1	1	1
744	AAA384	1	73	AAA	0	0	0	1	0	0	0	0
745	AAA385	1	73	AAA	0	1	0	0	0	0	0	2
746	AAA386	1	75	AAA	0	1	1	0	0	0	2	2
747	AAA387	1	72	AAA	0	0	1	0	0	0	2	2
748	AAA388	1	59	AAA	1	1	1	0	0	0	1	1
749	AAA389	0	75	AAA	0	1	0	0	0	0	1	1
750	AAA390	0	80	AAA	1	0	0	0	0	0	1	2
751	AAA391	1	71	AAA	1	0	1	1	0	2	1	1
752	AAA392	1	72	AAA	1	0	0	2	0	0	1	1
753	AAA393	1	72	AAA		0	1	1	0	1	0	1
754	AAA394	1	69	AAA		0	1	1	0	0	2	0
755	AAA395	1	63	AAA		1	1	1	0	1	0	0
756	AAA396	1	64	AAA		1	0	1	0	0	1	2
757	AAA397	0	45	AAA	0	1	0	1	0	0	0	1
758	AAA398	1	55	AAA	1	0	1	0	0	1	1	0
759	AAA399	1	72	AAA	0	0	1	1	0	1	0	1
760	AAA400	1	67	AAA	1	1	1	0	0	2	0	1
761	AAA401	1	57	AAA	0	1	0	1	0	0	1	1
762	AAA402	0	88	AAA	0	1	0	0	0	0	2	0
763	AAA403	1	70	AAA	0	1	0	0	0	1	0	0
765	AAA405	1	81	AAA	1	1	0	0	0	1	1	1
766	AAA406	1	86	AAA	1	0	1	0	0	0	0	0
767	AAA407	1	77	AAA	1	1	1	0	0	0	2	0
768	AAA408	1	54	AAA	1	1	0	1	0	1	1	1
769	AAA409	1	73	AAA	0	1	1	2	0	0	1	2
770	AAA410	1	40	AAA	0	0	0	0	0	1	1	1
771	AAA411	1	69	AAA	0	1	1	1	0	0	1	0
772	AAA412	1	59	AAA	1	0	0	0	0	0	1	1
773	AAA413	1	65	AAA	0	0	0	0	0	1	1	0
774	AAA414	1	62	AAA	0	1	1	1	0	0	0	0
775	AAA415	1	59	AAA	0	0	0	0	0	0	1	1
776	AAA416	1	60	AAA	1	0	0	1	0	0	1	2
777	AAA417	1	58	AAA	0	0	0	1	0	1	2	2
778	AAA418	1	61	AAA	1	2	0	0	0	0	0	2
779	AAA419	1	55	AAA	1	1	1	1	0	0	2	2
780	AAA420	1	67	AAA	0	0	0	0	0	0	0	1
781	AAA421	0	57	AAA	0	0	0	2	0	1	0	1
782	AAA422	0	72	AAA	0	1	1	0	0	0	0	1
783	AAA423	1	63	AAA	1	0	0	0	0	2	2	1
785	AAA425	1	59	AAA	0	0	2	1	0	1	0	2
786	AAA426	1	60	AAA	0	1	1	0	0	0	1	1
787	AAA427	1	65	AAA	1	0	1	0	0	1	1	1
788	AAA428	0	46	AAA	1	0	1	1	0	0	1	1
789	AAA429	1	57	AAA	1	0	1	0	0	1	1	2
790	AAA430	1	74	AAA	0	0	1	1	0	0	1	1
791	AAA431	1	81	AAA	1	1	1	1	0	1	1	1
792	AAA432	1	61	AAA	1	1	1	1	0	0	1	2
793	AAA433	1	76	AAA	0	1	0	0	0	0	1	0
794	AAA434	1	78	AAA		1	0	1	0	0	0	0
795	AAA435	1	77	AAA	0	1	0	1	0	0	1	1
796	AAA436	1	80	AAA	0	0	1	0	0	0	1	1
797	AAA437	1	74	AAA		0	1	0	0	1	1	2
798	AAA438	1	81	AAA	0	0	1	0	0	1	0	1
799	AAA439	1	76	AAA	0	0	0	0	0	1	0	1
800	AAA440	1	77	AAA	0	1	0	0	0	0	0	0
801	AAA441	1	73	AAA	0	0	0	0	0	1	1	1
802	AAA442	1	58	AAA	0	0	1	0	0	0	1	1
803	AAA443	1	68	AAA	0	0	0	1	0	0	0	1
804	AAA444	1	71	AAA	1	0	1	1	0	1	1	1
805	AAA445	1	62	AAA	0	0	0	0	0	0	0	2
806	AAA446	1	74	AAA	1	1	0	2	0	1	1	1
807	AAA447	1	66	AAA		1	0	2	0	0	0	1
808	AAA448	1	76	AAA	1	0	0	1	0	1	1	2
809	AAA449	1	67	AAA	0	0	0	1	0	0	0	1
810	AAA450	1	46	AAA	0	1	0	0	0	1	2	1
811	AAA451	1	82	AAA	0	0	1	0	0	1	0	2
812	AAA452	1	72	AAA	0	1	0	0	0	0	1	2
813	AAA453	1	69	AAA	0	0	2	0	0	1	2	0
814	AAA454	1	62	AAA	1	1	0	0	0	0	1	1
815	AAA455	1	85	AAA	0	0	1	0	0	1	1	0
816	AAA456	0	69	AAA	0	0	0	1	0	0	0	2
817	AAA457	1	65	AAA	1	1	0	1	0	1	1	0
818	AAA458	1	78	AAA	0	1	1	0	0	0	1	0
819	AAA459	1	44	AAA	0	0	0	1	0	0	1	1
820	AAA460	1	65	AAA	1	1	0	1	0	1	1	1
821	AAA461	1	60	AAA	1	2	0	1	0	0	0	1
822	AAA462	1	84	AAA	0	0	1	1	0	1	1	1
823	AAA463	1	77	AAA	1	1	0	2	0	1	0	0
824	AAA464	0	76	AAA	1	1	0	2	0	0	0	1
825	AAA465	0	85	AAA	0	1	1	0	0	0	1	0
826	AAA466	1	63	AAA	0	1	0	1	0	2	2	1
827	AAA467	1	57	AAA	0	0	0	0	0	1	0	2
828	AAA468	1	65	AAA	1	1	0	0	0	1	1	0
829	AAA469	1	67	AAA	1	0	1	0	0	0	0	0
830	AAA470	0	71	AAA	0	0	0	1	0	1	0	2
831	AAA471	1	82	AAA	1	1	0	1	1	1	0	0
833	AAA473	1	65	AAA	0	1	0	1	0	1	1	1
834	AAA474	1	69	AAA	0	0	2	1	0	0	2	0
835	AAA475	1	70	AAA		0	2	1	0	0	0	2
836	AAA476	1	73	AAA		0	1	0	0	0	0	2
837	AAA477	1	80	AAA	1	0	0	0	0	1	0	0
838	AAA478	1	55	AAA	0	2	0	2	0	0	0	1
839	AAA479	1	74	AAA	1	1	1	0	0	0	1	1
840	AAA480	1	66	AAA	0	0	0	1	0	0	0	2
841	AAA481	1	81	AAA	0	1	1	1	0	0	1	0
842	AAA482	1	83	AAA	1	1	0	2	0	2	1	1
843	AAA483	1	61	AAA	0	0	0	2	0	1	1	0
844	AAA484	1	72	AAA	0	0	2	0	0	1	1	1
855	AAA017	1	79	AAA		1	0	0	0	1	2	1
856	AAA130	1	72	AAA		1	0	0	0	0	0	2
857	AAA135	1	67	AAA	0	0	1	2	0	1	0	1
860	AAA144	1	70	AAA		1	1	1	0	1	1	0
863	AAA158	1	58	AAA	0	1	0	0	0	0	1	1
864	AAA494	1	63	AAA	0	1	1	0	0	0	0	1
865	AAA495	1	74	AAA	1	0	0	2	0	0	1	0
866	AAA496	1	75	AAA	0	0	1	0	0	0	0	2
867	AAA497	1	64	AAA	1	1	0	1	0	0	1	1
869	AAA499	1	77	AAA	1	1	0	0	0	1	2	2
870	AAA500	1	67	AAA		0	0	0	0	0	0	2
871	AAA501	1	67	AAA	1	0	1	1	0	0	1	2
872	AAA502	0	63	AAA	0	1	0	2	0	2	1	0
873	AAA503	1	72	AAA	0	2	0	0	0	1	2	2
874	AAA504	1	70	AAA	0	0	1	0	0	0	0	1
875	AAA505	0	63	AAA	1	1	1	1	0	0	1	2
876	AAA506	1	75	AAA	0	0	0	0	0	1	2	2
877	AAA507	1	64	AAA	1	0	1	1	0	0	1	1
1115	SL213	1	69	AAA	1	0	0	1	0	0	0	2
1151	SL253	1	66	AAA	1	1	0	0	0	0	1	1
1153	SL255	1	53	AAA	1	1	1	0	0	0	0	1
1177	SL279	1	59	AAA	1	0	1	2	0	0	2	2
1180	SL282	0	69	AAA	1	1	0	0	0	0	2	0
1212	SL314	1	54	AAA	1	0	0	0	0	1	0	0
1213	SL315	1	67	AAA	1	0	1	0	0	0	1	1
2283	AAA513	1	61	AAA		0	1	1	0	0	0	1
2284	AAA514	1	81	AAA		1	1	0	0	0	2	1
2285	AAA515	1	63	AAA	1	1	1	1	0	0	2	1
2286	AAA516	0	74	AAA	1	1	0	1	0	1	1	0
2287	AAA517	1	66	AAA		1	0	1	0	0	0	1
2288	AAA518	1	72	AAA	0	0	0	0	0	0	1	0
2289	AAA519	1	71	AAA	0	0	1	1	0	0	1	2
2290	AAA520	1	70	AAA	0	1	1	2	0	1	0	1
2291	AAA521	1	61	AAA	1	0	1	2	0	1	0	1
2292	AAA522	0	54	AAA	1	0	1	0	0	0	1	0
2293	AAA523	1	67	AAA	0	1	0	1	0	0	2	0
2294	AAA524	1	66	AAA	1	0	1	0	0	2	1	1
2295	AAA525	1	85	AAA	1	0	1	1	0	1	1	0
2296	AAA526	1	66	AAA	1	0	0	1	0	1	1	2
2297	AAA527	1	72	AAA		0	1	0	0	0	1	1
2298	AAA528	1	66	AAA	1	1	0	1	0	0	1	1
2299	AAA529	1	75	AAA	0	0	1	1	0	0	1	1
2300	AAA530	1	64	AAA	1	0	1	0	0	0	1	0
2301	AAA531	1	51	AAA	1	0	0	0	0	0	1	0
2302	AAA532	1	66	AAA	1	1	1	0	0	1	0	0
2303	AAA533	1	65	AAA	1	1	0	2	0	1	1	1
2304	AAA534	1	68	AAA	1	0	1	0	0	1	1	1
2305	AAA535	1	56	AAA	1	1	1	1	0	0	0	1
2306	AAA536	1	74	AAA	1	1	1	1	0	0	1	0
2307	AAA537	1	73	AAA	1	2	0	1	0	0	2	1
2308	AAA538	0	70	AAA	0	1	0	1	0	0	0	0
2309	AAA539	1	65	AAA	1	0	1	0	0	0	1	0
2310	AAA540	1	83	AAA	1	0	1	1	1	1	1	0
2311	AAA541	1	75	AAA	1	0	1	0	0	0	2	2
2312	AAA542	1	80	AAA		0	0	1	0	0	1	1
2313	AAA543	1	71	AAA	0	1	0	1	0	1	2	0
2314	AAA544	0	64	AAA	1	0	2	1	0	0	1	1
2315	AAA545	1	61	AAA		0	1	1	0	0	1	0
2316	AAA546	1	57	AAA	1	1	0	2	0	2	0	0
2317	AAA547	1	61	AAA	1	1	1	0	0	0	2	0
2318	AAA548	1	84	AAA		1	0	1	0	1	0	0
2319	AAA549	1	64	AAA	0	0	0	1	0	0	0	0
2320	AAA550	1	62	AAA	0	0	0	0	0	0	1	1
2321	AAA551	1	74	AAA	0	0	1	2	0	2	2	1
2322	AAA552	0	75	AAA	0	0	1	0	0	0	0	1
2323	AAA553	1	75	AAA	1	0	0	1	0	1	1	2
2324	AAA554	1	60	AAA		0	1	1	0	1	2	1
2325	AAA555	1	71	AAA	1	0	0	1	0	0	0	1
2326	AAA556	1	70	AAA	1	2	0	1	0	0	0	1
2327	AAA557	1	64	AAA	1	1	1	0	0	0	2	1
2328	AAA558	1	74	AAA	0	0	2	1	0	1	0	2
2329	AAA559	0	73	AAA	0	0	0	1	0	0	0	1
2573	EFB214	1	65	AAA	1	0	1	0	0	0	1	1
878	SL601	0	61	AIOD		0	0	1	0	1	2	1
879	SL603	1	53	AIOD		0	1	1	0	2	1	1
880	SL604	1	49	AIOD		0	1	0	0	0	1	1
881	SL605	0	47	AIOD		0	2	0	0	0	2	1
882	SL607	1	72	AIOD		0	0	0	0	1	1	0
883	SL608	1	45	AIOD		1	0	1	0	0	1	0
884	SL609	1	59	AIOD		2	0	0	0	0	1	2
885	SL610	0	59	AIOD		1	1	0	0	1	0	2
886	SL612	1	67	AIOD		1	0	1	0	0	1	1
887	SL613	1	57	AIOD		0	0	0	0	1	1	0
888	SL614	1	50	AIOD		0	0	1	0	0	0	0
889	SL615	1	46	AIOD		0	0	2	0	2	1	1
890	SL616	0	50	AIOD		1	0	1	0	0	1	1
891	SL617	1	50	AIOD		0	1	1	0	1	1	0
892	SL618	1	64	AIOD		0	1	2	0	0	2	0
893	SL619	0	50	AIOD		0	1	0	0	0	0	1
894	SL620	1	65	AIOD		1	1	1	0	1	1	2
895	SL621	1	46	AIOD		0	2	0	0	0	2	0
896	SL622	1	49	AIOD		0	2	0	0	1	1	2
897	SL623	1	69	AIOD		0	1	0	0	0	1	2
898	SL624	1	74	AIOD		0	0	1	0	0	0	2
899	SL625	0	52	AIOD		2	0	1	0	0	1	1
900	SL626	1	53	AIOD		1	0	2	0	2	1	1
901	SL627	1	59	AIOD		0	0	1	0	1	0	2
902	SL628	1	72	AIOD		0	0	1	0	0	1	0
903	SL629	1	69	AIOD		0	2	1	0	0	0	1
904	SL001	1	49	AIOD		1	0	0	0	0	1	2
905	SL002	0	77	AIOD		0	0	1	0	1	2	1
906	SL003	1	60	AIOD		0	2	1	0	0	2	1
907	SL243	1	54	AIOD		0	1	1	0	1	1	0
908	SL244	1	77	AIOD		0	1	1	0	1	2	0
909	SL245	1	58	AIOD		0	1	2	0	0	1	0
910	SL246	1	50	AIOD		2	0	2	0	2	1	0
911	SL004	1	48	AIOD		1	0	0	0	0	2	1
912	SL005	0	65	AIOD		1	0	1	0	1	1	0
913	SL006	1	62	AIOD		1	0	1	0	1	1	2
914	SL008	1	63	AIOD		0	1	2	0	0	1	0
915	SL009	1	69	AIOD		0	0	1	0	0	0	0
916	SL012	1	53	AIOD		1	1	0	0	0	2	1
917	SL013	0	51	AIOD		1	0	1	0	1	2	0
918	SL014	1	62	AIOD		0	0	1	0	1	0	1
919	SL016	1	56	AIOD		0	1	0	0	0	1	2
920	SL017	0	63	AIOD		0	2	0	0	2	1	1
921	SL018	0	48	AIOD		2	0	1	0	0	2	2
922	SL019	1	71	AIOD		0	2	1	0	0	1	0
923	AAA15	1	70	AIOD		0	0	1	0	0	1	1
924	SL020	1	59	AIOD		0	1	0	0	1	0	1
925	SL021	1	55	AIOD		0	1	1	0	0	0	0
926	SL022	0	44	AIOD		0	1	0	0	0	1	0
927	NT227	0	50	AIOD		0	1	1	0	0	1	2
928	SL023	1	53	AIOD		0	1	0	0	1	1	2
929	SL024	1	53	AIOD		1	0	1	0	1	1	0
930	SL025	1	65	AIOD		0	2	0	0	1	0	2
931	SL026	1	51	AIOD		1	0	1	0	0	1	1
932	SL027	1	59	AIOD		2	0	1		0	1	0
933	SL028	1	66	AIOD		1	1	1	0	1	2	0
934	SL029	1	46	AIOD		2	0	1	0	1	0	0
935	SL030	1	57	AIOD		1	0	1	0	0	0	1
936	SL031	0	57	AIOD		1	0	1	0	0	1	1
937	SL032	0	64	AIOD		1	1	1	0	0	2	1
938	SL033	1	54	AIOD		1	0	0	0	0	2	0
939	SL034	0	53	AIOD		1	1	0	0	1	1	2
940	SL035	1	58	AIOD		0	1	1	0	0	2	1
941	SL036	0	50	AIOD		1	1	0	0	1	0	2
942	SL037	0	58	AIOD		1	0	1	0	0	1	1
943	SL038	1	72	AIOD		0	0	1	0	0	1	0
944	SL040	1	67	AIOD		1	0	1	0	1	1	1
945	SL041	1	58	AIOD		0	1	1	0	2	0	1
946	SL042	0	57	AIOD		2	0	0	0	0	1	2
947	SL043	0	54	AIOD		1	0	1	0	1	2	0
948	SL044	1	68	AIOD		1	0	2	0	0	2	0
949	SL045	1	64	AIOD		1	1	2	0	2	0	0
950	SL046	1	63	AIOD		0	1	1	0	2	1	0
951	SL047	0	71	AIOD		0	2	1	0	1	1	1
952	SL048	1	57	AIOD		1	0	1	0	0	0	1
953	SL049	1	61	AIOD		1	0	0	0	1	0	2
954	SL050	0	69	AIOD		0	1	2	0	0	1	1
955	AAA16	1	64	AIOD		1	0	0	0	0	1	1
956	SL051	1	55	AIOD		0	1	1	0	0	0	1
957	SL052	0	50	AIOD		1	1	2	0	1	1	1
958	SL053	1	70	AIOD		1	1	0	0	0	1	1
959	SL054	0	70	AIOD		0	0	0	0	0	0	0
960	SL055	1	76	AIOD		0	1	0	0	0	0	0
961	SL056	1	55	AIOD		1	0	2	0	0	0	1
962	SL057	1	70	AIOD		1	1	1	0	0	1	0
963	SL058	1	63	AIOD		0	1	0	0	1	0	2
964	SL059	1	51	AIOD		0	1	0	0	0	0	2
965	SL060	1	54	AIOD		0	1	0	0	0	0	2
966	SL061	0	71	AIOD		1	1	1	0	0	1	2
967	SL062	1	72	AIOD		2	0	0	0	1	0	1
968	SL063	1	71	AIOD		0	0	0	0	0	1	1
969	SL064	1	52	AIOD		1	0	1	0	1	1	1
970	SL065	0	45	AIOD		0	1	1	0	1	1	1
971	SL066	1	44	AIOD		0	1	0	0	0	0	1
972	SL067	1	67	AIOD		2	0	1	0	0	1	1
973	SL068	1	56	AIOD		1	0	1	0	0	2	0
974	SL069	0	59	AIOD		0	0	2	0	0	2	1
975	SL070	1	46	AIOD		1	1	0	0	1	0	1
976	SL071	0	51	AIOD		1	0	2	0	0	1	1
977	SL072	1	71	AIOD		1	0	1	0	0	0	1
978	SL073	1	69	AIOD		0	0	0	0	0	1	1
979	SL074	0	55	AIOD		0	2	1	0	2	0	1
980	SL075	1	55	AIOD		0	0	0	0	0	0	1
981	SL076	1	56	AIOD		0	1	1	0	1	0	0
982	SL077	1	48	AIOD		0	2	0	0	1	0	2
983	SL078	0	66	AIOD		0	0	0	0	1	0	1
984	SL079	0	48	AIOD		1	1	0	0	0	1	1
985	SL080	1	66	AIOD		0	1	1	0	0	2	0
986	SL081	1	52	AIOD		1	0	0	0	1	2	2
987	SL082	0	55	AIOD		0	0	1	0	1	1	1
988	SL083	1	48	AIOD		0	1	1	0	1	1	2
989	SL084	0	46	AIOD		0	1	1	0	0	1	2
990	SL085	1	52	AIOD		1	1	0	0	1	1	0
991	SL086	1	49	AIOD		0	0	0	0	0	1	1
992	SL087	1	67	AIOD		0	0	2	0	0	2	2
993	SL088	1	53	AIOD		1	0	0	0	0	1	0
994	SL089	1	52	AIOD		0	0	0	0	1	2	1
995	SL090	1	77	AIOD		2	0	0	0	0	2	1
996	SL091	1	63	AIOD		1	0	0	0	1	1	1
997	SL092	0	70	AIOD		1	1	0	0	0	1	1
998	SL093	1	63	AIOD		1	1	0	0	0	1	1
999	SL094	1	61	AIOD		1	0	0	0	1	1	1
1000	SL095	0	65	AIOD		0	0	0	0	0	0	1
1001	SL096	1	55	AIOD		0	1	2	0	1	1	2
1002	SL097	1	71	AIOD		0	1	0	0	2	2	2
1003	SL098	1	59	AIOD		1	0	0	0	0	1	1
1004	SL099	1	56	AIOD		1	1	1	0	1	1	1
1005	SL100	1	43	AIOD		0	1	0	0	1	1	1
1006	SL101	1	55	AIOD		0	1	2	0	0	1	2
1007	SL102	1	59	AIOD		0	1	0	0	0	0	0
1008	SL103	1	61	AIOD		1	1	1	0	0	0	1
1009	SL104	0	55	AIOD		0	2	0	0	2	1	2
1010	SL105	1	51	AIOD		1	0	1	0	0	1	0
1011	SL107	0	78	AIOD		0	1	0	0	0	0	1
1012	SL108	1	70	AIOD		0	2	0	0	1	1	1
1013	SL109	1	63	AIOD		0	1	1	0	0	2	2
1014	SL111	1	74	AIOD		1	0	2	0	0	1	1
1015	SL112	0	63	AIOD		0	1	0	0	1	1	0
1016	SL113	0	52	AIOD		1	1	1	0	2	1	2
1017	SL114	0	55	AIOD		1	0	0	0	2	1	1
1018	SL115	0	54	AIOD		0	0	1	0	0	0	2
1019	SL116	0	63	AIOD		0	1	0	0	2	0	1
1020	SL118	1	76	AIOD		0	2	0	0	0	1	0
1021	SL119	0	66	AIOD		0	1	1	0	0	2	1
1022	SL120	0	64	AIOD		0	1	0	0	1	0	0
1023	SL121	1	65	AIOD		0	1	0	0	0	1	2
1024	SL122	1	59	AIOD		1	1	2	0	1	2	2
1025	SL123	0	63	AIOD		2	0	0	0	0	2	2
1026	SL124	1	58	AIOD		1	1	0	0	0	1	1
1027	SL125	0	73	AIOD		1	1	0	0	0	2	1
1028	SL126	0	57	AIOD		1	0	0	0	1	0	1
1029	SL127	0	54	AIOD		2	0	0	0	0	0	1
1030	SL128	1	62	AIOD		0	1	0	0	1	1	2
1031	SL129	1	58	AIOD		0	0	0	0	0	0	2
1032	SL130	1	75	AIOD		1	1	1	0	0	2	0
1033	SL131	1	59	AIOD		0	2	1	0	1	1	1
1034	SL132	1	57	AIOD		0	0	1	0	1	1	0
1035	SL133	1	58	AIOD		0	0	1	0	0	0	2
1036	SL134	1	61	AIOD		0	0	1	0	0	0	2
1037	SL135	1	55	AIOD		0	1	1	0	0	0	1
1038	SL136	0	57	AIOD		0	1	0	0	0	1	1
1039	SL137	1	50	AIOD		1	0	0	0	1	1	1
1040	SL138	1	57	AIOD		1	0	0	0	0	1	0
1041	SL139	1	57	AIOD		1	1	2	0	0	0	2
1042	SL141	0	73	AIOD		0	0	1	0	0	0	1
1043	SL142	1	61	AIOD		1	0	0	0	1	1	1
1044	SL143	1	59	AIOD		0	2	0	0	0	1	0
1045	SL144	0	75	AIOD		1	0	1	0	0	1	0
1046	SL145	0	61	AIOD		0	1	0	0	1	0	1
1047	SL146	1	63	AIOD		0	1	1	0	0	1	1
1048	SL147	1	73	AIOD		0	0	1	0	1	0	1
1049	SL148	0	51	AIOD		1	1	1	0	0	1	1
1050	SL149	1	56	AIOD		0	0	0	0	0	1	0
1051	SL150	0	78	AIOD		0	1	2	0	1	1	1
1052	SL151	1	51	AIOD		1	0	1	0	0	1	1
1053	SL152	1	62	AIOD		1	1	1	0	0	0	0
1054	SL153	1	57	AIOD		0	0	1	0	1	1	2
1055	SL154	1	61	AIOD		0	0	1	0	1	0	2
1056	SL155	1	55	AIOD		0	1	0	0	1	1	0
1057	SL156	1	78	AIOD		1	1	1	0	0	1	1
1058	SL157	0	51	AIOD		1	0	1	0	0	2	1
1059	SL158	1	56	AIOD		0	2	2	0	0	0	0
1060	SL159	1	56	AIOD		0	2	0	0	1	0	0
1061	SL160	1	75	AIOD		0	2	0	0	1	0	1
1062	SL161	1	66	AIOD		2	0	1	0	1	1	1
1063	SL162	1	60	AIOD		0	1	0	0	0	2	1
1064	SL163	1	60	AIOD		1	0	1	0	2	2	0
1065	SL164	0	52	AIOD		1	1	0	0	0	1	1
1066	SL165	0	50	AIOD		0	1	1	0	0	0	1
1067	SL166	1	55	AIOD		1	0	0	0	0	1	0
1068	SL167	1	71	AIOD		0	1	2	0	1	2	1
1069	SL168	1	53	AIOD		1	1	0	0	1	2	0
1070	SL169	1	65	AIOD		1	0	2	0	1	0	1
1071	SL170	1	72	AIOD		1	0	1	0	1	1	1
1072	SL171	1	63	AIOD		0	0	1	0	0	1	0
1073	SL172	1	68	AIOD		1	0	1	0	0	0	0
1074	SL173	1	72	AIOD		0	1	0	0	1	2	2
1075	SL174	1	69	AIOD		1	0	0	0	0	2	1
1076	SL175	1	61	AIOD		1	0	0	0	0	1	1
1077	SL176	1	69	AIOD		0	1	0	0	1	1	0
1078	SL177	1	69	AIOD		0	1	0	0	0	1	1
1079	SL178	0	53	AIOD		0	1	0	0	0	1	1
1080	SL179	1	59	AIOD		1	0	0	0	0	1	2
1081	SL180	1	77	AIOD		0	0	1	0	1	0	2
1082	SL181	1	47	AIOD		0	1	0	0	2	0	1
1083	SL182	1	66	AIOD		0	2	1	0	1	0	2
1084	SL183	1	58	AIOD		0	0	0	0	0	2	0
1085	SL184	1	61	AIOD		2	0	0	0	0	1	0
1086	SL185	0	49	AIOD		0	2	1	0	0	1	2
1087	SL186	1	57	AIOD		0	0	0	0	1	0	1
1088	SL187	1	60	AIOD		0	0	0	0	0	0	0
1090	SL188	1	65	AIOD		1	1	1	0	1	1	1
1091	SL189	1	50	AIOD		1	1	0	0	2	2	1
1092	SL190	1	56	AIOD		0	0	2	0	0	1	1
1093	SL191	1	57	AIOD		0	1	0	0	1	0	2
1094	SL192	0	62	AIOD		0	0	0	0	2	0	1
1095	SL193	1	79	AIOD		0	0	0	0	0	2	2
1096	SL194	0	69	AIOD		0	0	1	0	0	1	0
1097	SL195	1	60	AIOD		1	1	0	0	0	1	0
1098	SL196	1	57	AIOD		0	1	1	0	1	0	1
1099	SL197	1	77	AIOD		0	0	2	0	1	1	2
1101	SL199	1	67	AIOD		1	0	1	0	1	1	2
1102	SL200	1	75	AIOD		0	0	1	0	2	1	0
1103	SL201	1	67	AIOD		0	0	1	0	2	2	1
1104	SL202	1	53	AIOD		0	0	1	0	1	0	1
1105	SL203	1	70	AIOD		0	2	1	0	0	1	0
1106	SL204	0	74	AIOD		2	0	0	0	2	1	1
1107	SL205	1	59	AIOD		0	1	1	0	1	1	1
1108	SL206	0	62	AIOD		0	1	0	0	2	1	2
1109	SL207	1	59	AIOD		1	0	0	0	0	1	0
1110	SL208	1	54	AIOD		0	0	0	0	0	0	1
1111	SL209	0	71	AIOD		0	1	1	0	1	2	0
1112	SL210	1	60	AIOD		0	0	0	0	2	2	1
1113	SL211	1	50	AIOD		1	1	0	0	0	2	1
1116	SL214	0	77	AIOD		1	1	2	0	1	0	0
1117	SL215	1	66	AIOD		1	0	0	0	1	0	1
1118	SL216	1	69	AIOD		0	1	0	0	2	2	0
1119	SL217	1	73	AIOD		0	1	2	0	1	2	1
1120	SL218	0	53	AIOD		0	1	0	0	0	2	1
1121	SL219	1	62	AIOD		0	1	0	0	1	0	1
1122	SL220	1	67	AIOD		1	1	1	0	1	1	2
1123	SL221	1	64	AIOD		0	2	1	0	0	1	1
1124	SL222	1	63	AIOD		2	0	1	0	0	2	1
1125	SL223	1	78	AIOD		0	1	0	0	1	0	1
1126	SL224	1	58	AIOD		0	1	0	0	0	0	0
1127	SL225	0	68	AIOD		1	0	0	0	0	0	2
1128	SL226	0	71	AIOD		1	1	2	0	0	1	2
1129	SL227	0	57	AIOD		0	1	1	0	0	1	2
1130	SL228	1	51	AIOD		2	0	1	0	2	0	0
1131	SL229	1	46	AIOD		1	1	1	0	0	0	0
1132	SL230	1	62	AIOD		0	2	0	0	1	2	1
1133	SL231	1	53	AIOD		0	2	1	0	0	1	2
1134	SL232	1	62	AIOD		1	0	2	0	1	1	1
1135	SL233	0	75	AIOD		1	0	1	0	0	1	1
1136	SL234	1	53	AIOD		0	2	1	0	1	1	1
1137	SL235	1	73	AIOD		0	1	1	0	0	0	2
1138	SL236	1	58	AIOD		1	1	0	0	1	2	1
1139	SL237	1	80	AIOD		0	0	0	0	1	1	1
1140	SL238	1	53	AIOD		0	2	1	0	0	0	1
1141	SL239	1	54	AIOD		0	0	0	0	0	1	2
1142	SL240	1	53	AIOD		0	2	1	0	1	2	1
1143	SL241	0	63	AIOD		0	1	0	0	0	1	1
1144	SL242	1	63	AIOD		1	1	0	0	0	0	1
1145	SL247	1	59	AIOD		0	1	2	0	0	2	2
1146	SL248	1	70	AIOD		0	1	2	0	1	2	1
1147	SL249	1	64	AIOD		0	0	2	0	0	2	1
1148	SL250	0	58	AIOD		1	1	0	0	1	1	2
1149	SL251	1	60	AIOD		0	0	0	0	2	0	2
1150	SL252	0	57	AIOD		1	0	1	0	1	2	0
1152	SL254	1	50	AIOD		1	1	0	0	0	1	1
1154	SL256	1	54	AIOD		0	0	1	0	1	0	2
1155	SL257	0	57	AIOD		0	0	2	0	0	0	1
1156	SL258	1	53	AIOD		0	0	0	0	0	1	1
1157	SL259	0	53	AIOD		0	1	2	0	1	0	2
1158	SL260	1	55	AIOD		0	0	1	0	0	1	2
1159	SL261	1	58	AIOD		1	0	0	0	1	1	1
1160	SL262	0	73	AIOD		0	2	2	0	0	1	1
1161	SL263	1	62	AIOD		0	1	0	0	0	1	0
1162	SL264	1	86	AIOD		0	1	0	0	1	1	1
1163	SL265	1	63	AIOD		1	1	1	0	1	1	1
1164	SL266	0	75	AIOD		0	0	1	0	1	0	2
1165	SL267	1	49	AIOD		0	1	1	0	1	1	2
1166	SL268	1	64	AIOD		0	1	1	0	0	1	0
1167	SL269	1	56	AIOD		2	0	1	0	0	0	1
1168	SL270	1	62	AIOD		1	0	1	0	1	1	1
1169	SL271	1	57	AIOD		1	0	1	0	2	0	2
1170	SL272	1	64	AIOD		1	0	1	0	1	1	0
1171	SL273	0	50	AIOD		1	1	0	0	0	1	1
1172	SL274	1	60	AIOD		0	0	1	0	0	1	2
1173	SL275	1	76	AIOD		1	0	0	0	1	1	2
1174	SL276	1	58	AIOD		0	0	0	0	0	1	0
1175	SL277	1	54	AIOD		0	1	1	0	1	1	1
1176	SL278	1	64	AIOD		0	0	0	0	1	0	1
1178	SL280	1	47	AIOD		0	1	0	0	1	0	0
1179	SL281	1	70	AIOD		0	0	0	0	1	0	0
1181	SL283	1	60	AIOD		1	0	0	0	0	2	1
1182	SL284	0	56	AIOD		0	1	2	0	1	2	1
1183	SL285	0	61	AIOD		0	0	0	0	0	1	0
1184	SL286	1	47	AIOD		0	0	2	0	2	0	1
1185	SL287	0	71	AIOD		0	0	0	0	1	2	0
1187	SL289	1	73	AIOD		2	0	2	0	0	2	0
1188	SL290	1	67	AIOD		0	0	1	0	1	0	0
1189	SL291	1	57	AIOD		1	0	1	0	1	0	0
1190	SL292	1	62	AIOD		1	0	2	0	0	0	0
1191	SL293	1	55	AIOD		1	0	0	0	1	1	1
1192	SL294	0	65	AIOD		0	1	1	0	0	2	1
1193	SL295	0	44	AIOD		0	0	0	0	1	0	2
1195	SL297	0	62	AIOD		0	1	0	0	1	0	1
1196	SL298	1	60	AIOD		0	1	2	0	0	1	1
1197	SL299	1	51	AIOD		1	0	1	0	0	2	0
1198	SL300	1	57	AIOD		0	1	1	0	0	2	1
1199	SL301	1	77	AIOD		0	1	1	0	1	2	1
1200	SL302	1	59	AIOD		0	1	1	0	1	1	1
1201	SL303	0	60	AIOD		0	0	0	0	1	0	1
1202	SL304	1	47	AIOD		0	0	2	0	2	0	1
1203	SL305	0	53	AIOD		2	0	0	0	1	1	2
1204	SL306	0	57	AIOD		1	0	1	0	0	1	0
1205	SL307	1	55	AIOD		1	1	0	0	0	1	0
1206	SL308	0	56	AIOD		0	0	1	0	1	0	2
1207	SL309	0	59	AIOD		0	0	0	0	1	1	1
1208	SL310	0	61	AIOD		1	0	1	0	0	1	1
1209	SL311	1	65	AIOD		1	1	1	0	1	1	0
1210	SL312	1	59	AIOD		1	0	0	0	0	1	1
1211	SL313	1	63	AIOD		0	1	1	0	2	0	0
1214	SL316	0	60	AIOD		0	0	0	0	2	0	2
1215	SL317	0	66	AIOD		0	2	0	0	0	1	0
1216	SL318	1	54	AIOD		0	2	1	0	0	2	2
1217	SL319	1	50	AIOD		1	0	1	0	0	0	2
1218	SL320	1	57	AIOD		0	1	1	0	0	2	1
1219	SL321	0	44	AIOD		0	1	0	0	0	1	1
1220	SL322	1	49	AIOD		0	1	1	0	1	2	2
1221	SL323	1	55	AIOD		1	0	0	0	1	1	1
1222	SL324	1	75	AIOD		1	0	1	0	0	2	0
1223	SL325	0	68	AIOD		0	1	1	0	1	0	2
1224	SL326	0	58	AIOD		1	1	1	0	1	2	1
1225	SL327	0	54	AIOD		1	1	0	0	0	2	1
1226	SL328	0	57	AIOD		1	1	2	0	1	1	1
1227	SL329	1	57	AIOD		0	1	0	0	1	0	1
1228	SL330	1	74	AIOD		0	1	0	0	0	0	2
1229	SL331	0	50	AIOD		0	1	2	0	1	1	1
1230	SL332	1	75	AIOD		0	1	0	0	0	0	2
1231	SL333	0	59	AIOD		0	1	0	0	0	1	2
1232	SL334	1	63	AIOD		0	0	2	0	1	2	0
1233	SL335	1	62	AIOD		0	1	0	0	2	1	2
1234	SL336	0	57	AIOD		0	0	2	0	0	0	0
1235	SL337	1	61	AIOD		0	1	0	0	0	1	0
1236	SL338	1	78	AIOD		1	1	0	0	0	1	0
1238	SL340	1	55	AIOD		0	1	0	0	0	0	1
1239	SL341	1	62	AIOD		0	1	1	0	0	1	1
1240	SL342	1	55	AIOD		1	0	0	0	2	2	1
1242	SL344	0	61	AIOD		0	1	2	0	2	0	0
1243	SL345	1	57	AIOD		1	0	1	0	1	1	2
2280	NT381	1	53	AIOD		2	0	2		1	1	0
2332	AAA562	1	76	AIOD		1	1	0	0	1	1	0
2475	SL349	1	54	AIOD		1	0	1	0	1	0	1
2476	SL350	1	55	AIOD		0	1	1	0	1	2	1
2477	SL351	1	67	AIOD		0	0	1	1	2	2	1
2478	SL352	1	49	AIOD		1	0	0	0	1	0	1
2479	SL353	1	83	AIOD		0	1	1	0	1	0	2
2480	SL354	0	62	AIOD		1	1	0	0	2	0	1
2481	SL355	1	58	AIOD		0	1	1	0	0	1	2
2482	SL356	1	75	AIOD		1	0	2	0	2	0	0
2483	SL357	0	63	AIOD		1	0	1	0	0	1	0
2484	SL358	1	66	AIOD		0	1	1	0	0	1	0
2485	SL359	1	67	AIOD		0	0	1	0	0	1	1
2486	SL360	1	63	AIOD		1	1	0	0	0	1	1
2487	SL361	1	66	AIOD		1	1	1	0	0	1	2
2488	SL362	1	54	AIOD		1	0	0	0	0	1	0
2489	SL363	1	55	AIOD		0	0	0	0	1	1	1
2490	SL364	1	58	AIOD		0	0	1	0	1	0	0
2491	SL365	1	86	AIOD		0	0	0	0	0	0	1
2492	SL366	1	62	AIOD		0	1	0	0	1	0	2
2493	SL367	1	60	AIOD		0	1	1	0	1	0	0
2494	SL368	1	58	AIOD		0	0	0	0	2	1	1
2495	SL369	1	65	AIOD		0	2	0	0	1	1	1
2496	SL370	1	67	AIOD		1	0	0	0	0	1	2
2497	SL371	1	73	AIOD		1	1	2	0	0	2	1
2498	SL372	1	68	AIOD		1	0	1	0	1	1	0
2499	SL373	1	80	AIOD		2	0	1	0	1	1	0
2500	SL374	1	66	AIOD		0	0	1	0	1	0	1
2501	SL365a	1	86	AIOD		1	0	1	0	1	1	1
2502	SL375	0	60	AIOD		0	0	2	0	0	0	1
2503	SL376	0	50	AIOD		1	1	1	0	0	1	1
2504	SL377	0	68	AIOD		1	1	1	0	1	0	2
2505	SL378	1	64	AIOD		0	0	1	0	1	0	0
2509	PAD001	1	61	AIOD		0	0	1	0	1	1	0
2510	PAD002	0	69	AIOD		0	0	1	0	1	1	0
2511	PAD003	0	66	AIOD		1	1	1	0	0	1	0
2512	PAD004	1	53	AIOD		0	0	0	0	0	0	0
2513	PAD005	0	61	AIOD		0	0	0	0	1	1	1
2514	PAD006	1	68	AIOD		0	0	1	0	0	1	1
2536	PAD028	0	67	AIOD		2	0	0	0	0	1	1
2545	PAD037	1	57	AIOD		0	1	0	0	0	0	0
2551	PAD043	1	53	AIOD		1	1	0	0	1	1	1
2554	PAD046	0	66	AIOD		0	0	0	0	1	1	1
2565	PAD057	0	63	AIOD		0	0	2	0	0	2	0
2572	EFB213	1	69	AIOD		2	0	0	0	1	1	1
2574	EFB215	1	50	AIOD		0	0	0	0	1	0	0
2575	EFB216	1	65	AIOD		1	0	0	0	1	1	1
2576	EFB217	1	69	AIOD		1	0	0	0	1	0	1
96	KA1	1	47	Control		0	1	1	0	1	2	1
97	KA2	1	60	Control		0	1	0	0	1	1	2
98	P126	0	38	Control		1	1	0	0	2	2	1
99	P127	1	66	Control		1	0	0	0	0	1	0
100	P128	1	43	Control		1	0	1	0	0	0	1
101	P129	1	64	Control		1	1	1	0	1	1	0
105	P133	0	50	Control		0	0	1	0	0	0	1
106	P134	0	52	Control		2	0	2	0	1	0	0
107	P136	0	77	Control		1	1	0	0	0	1	0
108	P137	0	69	Control		0	0	1	0	1	0	1
109	P138	0	49	Control		1	1	0	0	0	1	1
110	P139	0	56	Control		1	0	0	0	0	1	1
111	P141	1	58	Control		0	1	0	0	0	1	1
112	P142	1	50	Control		2	0	1	0	1	0	1
113	P143	0	68	Control		0	1	1	0	1	1	2
114	P144	1	72	Control		0	1	1	0	0	0	0
115	P145	0	55	Control		0	1	2	0	0	1	2
117	P148	1	56	Control		1	0	1	0	0	0	2
118	P150	0	70	Control		1	1	1	0	1	0	1
119	P151	0	59	Control		1	0	1	0	0	2	0
120	P152	0	83	Control		1	0	0	0	2	1	1
121	P153	0	81	Control		1	0	1	0	0	1	1
122	P154	1	61	Control		0	2	1	0	2	0	2
123	P155	1	60	Control		0	0	1	0	0	0	1
124	P157	1	55	Control		0	1	1	0	0	1	0
125	P158	0	77	Control		0	1	2	0	1	0	1
127	P160	0	78	Control		1	0	0	0	0	0	1
128	P161	1	55	Control		0	0	0	0	1	1	1
129	P162	1	77	Control		0	0	0	0	1	1	0
131	P165	1	66	Control		0	2	0	0	0	1	1
133	P167	1	51	Control		0	2	0	0	2	1	0
134	P168	0	56	Control		0	0	0	0	1	1	1
137	P171	0	53	Control		0	0	0	0	0	1	2
138	P172	1	60	Control		0	1	0	0	0	0	1
140	P174	1	82	Control		2	0	1	0	1	2	0
141	P176	1	81	Control		1	1	1	0	0	1	2
143	P178	1	51	Control		1	0	1	0	0	1	2
144	P179	1	61	Control		1	1	1	0	1	0	0
145	P180	1	77	Control		0	1	1	0	1	0	1
147	P182	1	59	Control		1	0	1	0	0	1	2
149	P185	1	54	Control		1	0	0	0	0	1	0
150	P186	1	64	Control		0	2	2	0	1	1	0
151	P187	0	54	Control		2	0	0	0	1	1	1
152	P188	1	56	Control		0	1	0	0	1	1	1
153	P189	1	39	Control		0	1	1	0	0	2	1
156	P192	1	50	Control		0	2	1	0	1	2	0
158	P196	1	55	Control		0	0	1	0	1	1	1
159	P198	0	78	Control		1	0	1	0	1	0	1
160	P199	0	58	Control		1	0	1	0	0	0	0
161	P202	1	56	Control		1	1	0	0	1	2	1
162	P203	1	54	Control		0	1	1	0	1	1	1
164	P206	1	56	Control		0	0	1	0	0	0	0
165	P207	1	49	Control		1	0	0	0	0	1	1
166	P208	1	43	Control		0	0	1	0	0	0	1
167	P209	1	50	Control		0	0	0	0	0	1	1
168	P210	0	54	Control		0	0	1	0	1	1	1
169	P211	0	74	Control		0	0	1	0	0	2	1
170	P212	1	55	Control		0	0	1	0	1	0	1
171	P213	1	54	Control		0	2	0	0	2	0	2
172	P215	0	82	Control		0	1	1	0	0	0	1
173	P217	1	45	Control		2	0	0	0	1	0	2
175	P219	0	54	Control		1	1	0	0	1	0	0
176	P220	0	52	Control		0	0	1	0	0	1	2
178	P223	1	48	Control		2	0	1	0	1	1	2
179	P224	0	72	Control		0	1	0	0	1	1	2
180	P225	1	37	Control		1	1	2	0	0	0	1
182	P228	1	60	Control		1	1	1	0	0	1	1
184	P230	0	55	Control		2	0	2	0	0	1	1
185	P232	1	55	Control		1	0	1	0	0	1	2
186	P233	0	49	Control		0	1	1	0	0	2	0
188	P236	0	56	Control		1	0	1	0	0	0	1
189	P237	0	54	Control		1	0	1	0	0	2	1
190	P238	0	58	Control		1	1	0	0	1	0	2
191	P239	1	58	Control		0	0	1	0	0	1	1
192	P240	0	56	Control		0	2	1	0	1	1	2
193	P241	1	59	Control		2	0	1	0	0	0	0
199	P247	0	81	Control		0	0	1	0	0	0	0
200	P248	0	67	Control		0	2	0	0	2	1	2
234	BD01	1	62	Control		2	0	0	0	0	0	1
235	BD02	1	49	Control		0	0	0	0	1	2	2
236	BD03	1	50	Control		1	1	2	0	1	1	2
237	BD04	1	47	Control		1	0	0	0	2	2	1
238	BD05	1	49	Control		1	1	0	0	1	0	0
239	BD06	1	62	Control		1	1	0	0	1	2	0
240	BD07	1	47	Control		0	2	1	0	1	2	0
241	BD08	1	51	Control		2	0	1	0	1	1	0
242	BD09	1	57	Control		1	0	0	0	0	1	0
243	BD10	1	60	Control		0	1	0	0	0	1	1
244	BD11	1	58	Control		0	1	0	0	0	1	0
245	BD12	1	49	Control		1	0	0	0	0	0	1
246	BD13	1	50	Control		0	0	1	0	0	1	0
247	BD14	1	50	Control		0	2	2	0	0	1	1
248	BD15	1	47	Control		0	2	2	0	0	0	1
249	BD16	1	58	Control		0	0	1	0	2	1	1
250	BD17	1	52	Control		0	1	0	0	1	1	0
251	BD18	1	60	Control		1	1	1	0	0	0	1
252	BD19	1	48	Control		1	0	2	0	0	0	1
253	BD20	1	60	Control		1	1	1	0	0	2	1
254	BD21	1	50	Control		1	0	0	0	0	0	0
255	BD22	1	47	Control		0	1	1	0	1	1	0
256	BD23	1	49	Control		0	0	1	0	1	2	2
257	BD24	1	52	Control		0	0	0	0	1	1	1
258	BD25	1	50	Control		0	2	1	0	0	1	0
259	BD26	1	51	Control		0	0	1	0	2	1	1
260	BD27	1	57	Control		1	0	1	0	0	0	2
261	BD28	1	57	Control		0	2	1	0	0	0	2
262	BD29	1	60	Control		1	0	1	0	1	1	1
263	BD30	1	57	Control		0	2	0	0	1	0	0
264	BD31	1	59	Control		0	0	0	0	1	1	2
265	BD32	1	50	Control		0	2	1	0	0	1	2
266	BD33	1	60	Control		0	2	0	0	1	0	1
267	BD34	1	47	Control		1	0	0	0	0	0	1
268	BD35	1	51	Control		0	0	1	0	1	1	2
269	BD36	1	49	Control		0	0	1	0	1	0	1
270	BD37	1	52	Control		0	2	0	0	0	1	2
271	BD38	1	59	Control		2	0	0	0	0	1	1
272	BD39	1	51	Control		0	0	0	0	0	1	1
273	BD40	1	61	Control		0	2	1	0	0	2	0
274	BD41	1	60	Control		0	0	2	0	0	0	1
275	BD42	1	54	Control		1	0	0	0	0	0	0
276	BD42a	1	55	Control		1	0	0	0	1	0	0
277	BD43	1	48	Control		0	1	0	0	0	1	1
278	BD44	1	51	Control		1	1	0	0	0	0	1
279	BD45	1	49	Control		2	0	2	0	1	0	2
280	BD46	1	58	Control		0	1	2	0	1	1	1
281	BD47	1	51	Control		1	0	0	0	1	0	0
282	BD48	1	56	Control		1	1		0	1	1	1
283	BD49	1	49	Control		0		0		1	1
284	EFK001	1	58	Control		1	1	0	0	1	0	1
285	EFK002	1	57	Control		1	0	0	0	1	1	0
286	EFK003	1	58	Control		1	1	0	0	0	1	1
287	EFK004	1	52	Control		1	1	0	0	0	1	2
288	EFK005	1	62	Control		1	0	0	0	1	1	1
289	EFK006	1	53	Control		0	2	1	0	2	2	1
290	EFK007	1	49	Control		0	0	0	0	0	2	1
291	EFK008	1	53	Control		1	1	1	0	1	1	1
292	EFK009	1	60	Control		1	0	1	0	1	1	2
293	EFK010	1	53	Control		0	1	0	0	0	0	0
294	EFK011	1	53	Control		0	0	1	0	1	0	2
295	EFK012	1	60	Control		0	2	1	0	0	1	1
296	EFK013	1	48	Control		1	0	1	0	2	0	1
297	EFK014	1	50	Control		1	1	1	0	0	1	2
298	EFK015	1	55	Control		1	0	2	0	0	1	0
299	EFK016	1	48	Control		0	1	0	0	0	0	0
300	EFK017	1	53	Control		0	2	0	0	1	2	0
301	EFK018	1	56	Control		0	0	1	0	0	0	0
302	EFK019	1	56	Control		0	1	0	0	1	2	0
303	EFK020	1	44	Control		0	0	0	0	1	0	1
304	EFK021	1	42	Control		0	0	1	0	0	0	1
305	EFK022	1	46	Control		1	0	0	0	0	2	0
306	EFK023	1	42	Control		0	2	0	0	2	2	1
307	EFK024	1	46	Control		0	1	0	0	0	1	0
308	EFK025	1	53	Control		1	0	0	0	0	1	2
309	EFK026	1	48	Control		0	1	0	0	0	0	1
310	EFK027	1	56	Control		1	0	1	0	1	0	0
311	EFK028	1	62	Control		0	0	0	0	1	1	2
312	EFK029	1	44	Control		2	0	1	0	0	2	1
313	EFK030	1	60	Control		1	0	1	0	0	0	1
314	EFK031	1	49	Control		0	2	1	0	2	0	0
315	EFK032	1	53	Control		1	1	0	0	0	0	1
316	EFK033	1	50	Control		1	0	0	0	0	0	0
317	EFK034	1	54	Control		1	1	1	0	1	0	1
318	EFK035	1	56	Control		0	1	1	0	0	1	0
319	EFK036	1	46	Control		1	0	1	0	0	0	2
320	EFK037	1	45	Control		1	0	0	0	0	1	1
321	EFK01D	1	51	Control		0	1	0	0	0	2	0
322	EFK038	1	51	Control		0	1	2	0	0	1	1
323	EFK039	1	60	Control		0	2	0	0	1	1	2
324	EFK040	1	50	Control		0	0	0	0	0	1	1
325	EFK041	1	44	Control		1	1	0	0	1	2	0
326	EFK042	1	48	Control		2	0	0	0	0	1	1
327	EFK043	1	44	Control		1	0	0	0	0	0	0
328	EFK044	1	40	Control		1	1	2	0	0	1	0
329	EFK045	1	56	Control		0	1	1	0	1	1	1
330	EFK046	1	75	Control		0	1	1	0	1	0	1
331	EFK047	1	48	Control		0	2	2	0	1	0	1
332	EFK048	1	50	Control		0	0	1	0	2	2	0
333	EFK049	1	37	Control		1	0	1	0	1	0	0
626	AAA264	1	58	Control		0	1	0	0	0	2	1
764	AAA404	1	60	Control		1	0	0	0	1	0	0
1100	SL198	1	59	Control		0	1	2	0	0	1	1
1114	SL212	1	60	Control		1	0	1	0	1	2	2
1186	SL288	1	60	Control		2	0	0	0	0	0	0
1194	SL296	0	62	Control		1	0	0	0	0	1	1
1244	NT016	1	55	Control		0	0	1	0	0	2	1
1245	NT017	1	72	Control		0	0	0	0	1	1	0
1246	NT018	1	54	Control		1	1	1	0	1	1	1
1247	NT019	1	64	Control		0	1	2	0	0	0	0
1250	NT022	1	64	Control		0	1	1	0	1	2	0
1254	NT026	1	55	Control		0	2	0	0	0	1	0
1258	NT031	1	66	Control		1	1	1	0	0	2	1
1259	NT032	1	57	Control		0	1	0	0	0	2	2
1261	NT034	1	64	Control		0	1	0	0	0	2	1
1262	NT035	1	83	Control		1	1	0	0	0	1	1
1263	NT036	0	63	Control		0	1	1	0	1	1	1
1264	NT037	0	70	Control		0	0	2	0	1	1	1
1265	NT038	1	69	Control		0	0	0	0	2	0	1
1266	NT040	1	45	Control		1	0	0	0	0	2	1
1267	NT042	1	66	Control		0	0	0	0	1	0	1
1269	NT044	0	48	Control		0	0	1	0	0	0	1
1271	NT046	1	75	Control		0	0	1	0	1	2	0
1273	NT048	0	67	Control		0	0	2	0	1	0	0
1274	NT049	1	63	Control		0	1	0	0	0	0	0
1275	NT050	1	65	Control		2	0	1	0	1	1	2
1277	NT052	1	71	Control		0	2	1	0	0	0	1
1278	NT053	1	70	Control		1	0	1	0	1	1	2
1280	NT055	1	63	Control		0	1	1	0	0	0	2
1283	NT058	1	62	Control		1	1	1	0	0	0	1
1284	NT059	1	60	Control		0	0	2	0	0	1	1
1285	NT060	0	62	Control		1	1	1	0	1	0	1
1286	NT061	0	72	Control		1	0	0	0	0	0	0
1290	NT065	1	74	Control		0	0	1	0	0	2	1
1295	NT070	1	73	Control		0	1	1	1	0	1	2
1297	NT072	1	77	Control		1	1	1	0	0	2	1
1304	NT079	1	52	Control		0	0	1	0	0	0	1
1305	NT081	0	66	Control		0	1	2	0	0	0	1
1307	NT083	1	69	Control		1	0	0	0	0	1	1
1308	NT084	1	63	Control		2	0	0	0	1	2	0
1310	NT086	0	70	Control		1	1	1	0	1	1	1
1312	NT088	1	58	Control		0	1	0	0	0	2	1
1316	NT092	1	78	Control		1	0	0	0	0	2	0
1318	NT094	1	71	Control		0	1	1	0	0	1	1
1324	NT100	1	69	Control		1	0	1	0	0	0	1
1325	NT101	1	76	Control		0	2	0	0	0	1	0
1326	NT102	1	67	Control		0	0	0	0	1	2	1
1327	NT103	1	72	Control		0	0	1	0	1	0	0
1329	NT105	0	62	Control		0	0	0	0	1	1	1
1330	NT106	1	73	Control		2	0	0	0	1	1	1
1333	NT110	1	71	Control		1	0	0	0	1	0	1
1334	NT111	0	68	Control		1	0	1	0	0	0	0
1337	NT114	1	69	Control		0	1	0	0	1	1	2
1338	NT115	1	65	Control		0	0	1	0	1	1	0
1341	NT119	0	66	Control		0	0	1	0	0	0	2
1342	NT120	1	65	Control		0	0	0	0	1	0	1
1343	NT121	1	56	Control		0	0	0	0	1	2	2
1345	NT123	1	50	Control		0	0	1	0	2	1	0
1346	NT124	0	63	Control		1	0	0	0	1	0	1
1347	NT125	1	65	Control		0	0	1	0	0	0	0
1349	NT128	0	70	Control		0	0	2	0	1	2	0
1351	NT130	1	57	Control		0	0	0	0	0	1	1
1353	NT132	1	64	Control		0	2	0	0	0	1	2
1354	NT133	1	65	Control		0	0	1	0	1	0	1
1356	NT135	1	66	Control		0	1	2	0	1	0	1
1357	NT136	0	72	Control		0	1	0	0	1	0	1
1359	NT138	1	62	Control		0	1	1	0	1	0	0
1360	NT140	1	69	Control		1	1	0	0	1	0	2
1361	NT141	0	65	Control		1	0	0	0	1	0	0
1362	NT142	1	76	Control		1	1	0	0	0	1	1
1364	NT144	0	73	Control		0	1	1	0	0	1	1
1369	NT149	1	49	Control		0	0	1	0	2	1	0
1373	NT154	1	62	Control		0	1	1	0	0	1	1
1375	NT156	0	57	Control		2	0	0	0	1	0	1
1377	NT158	1	76	Control		0	0	1	0	1	2	1
1379	NT161	0	54	Control		1	0	0	0	0	2	2
1381	NT163	1	69	Control		1	0	1	0	0	0	2
1382	NT166	1	68	Control		1	0	0	0	1	2	2
1383	NT167	1	69	Control		1	0	1	0	1	1	2
1385	NT170	0	68	Control		1	1	0	0	1	0	2
1387	NT173	1	59	Control		1	1	1	0	0	2	1
1389	NT175	1	65	Control		2	0	1	0	0	2	2
1390	NT176	1	62	Control		0	1	1	0	1	1	1
1392	NT178	0	69	Control		0	1	0	0	2	1	1
1393	NT179	1	68	Control		1	0	1	0	0	0	2
1394	NT180	1	66	Control		1	1	1	0	1	0	1
1395	NT181	1	66	Control		0	0	0	0	0	2	1
1396	NT182	1	64	Control		0	1	1	0	0	0	2
1397	NT183	1	63	Control		1	1	0	0	0	1	1
1398	NT184	0	64	Control		1	0	0	0	0	0	0
1400	NT186	1	71	Control		0	0	2	0	0	1	1
1402	NT188	0	69	Control		0	0	0	0	1	1	2
1403	NT189	1	76	Control		0	1	1	0	0	1	0
1407	NT193	0	63	Control		1	0	0	0	0	2	2
1410	NT196	1	69	Control		1	0	0	0	0	1	2
1413	NT199	1	66	Control		0	0	1	0	1	2	1
1414	NT200	0	75	Control		0	1	1	0	0	2	1
1416	NT202	1	67	Control		2	0	2	0	1	1	0
1420	NT207	0	69	Control		1	0	1	0	0	1	0
1422	NT209	1	73	Control		1	0	2	0	0	0	1
1424	NT211	0	50	Control		1	0	1	0	2	1	2
1425	NT212	0	62	Control		0	1	0	0	0	0	1
1427	NT214	0	74	Control		1	0	0	0	1	1	0
1429	NT216	1	66	Control		0	2	2	0	0	0	2
1430	NT217	1	73	Control		1	1	0	0	1	2	1
1432	NT219	0	74	Control		0	1	1	0	2	0	1
1433	NT220	0	59	Control		1	0	1	0	0	1	1
1434	NT221	1	70	Control		0	1	0	0	2	1	0
1435	NT222	1	80	Control		1	1	0	0	1	0	1
1436	NT224	1	65	Control		0	0	1	0	2	1	1
1438	NT226	0	67	Control		1	1	1	0	1	0	1
1440	NT229	1	54	Control		2	0	1	0	0	1	0
1441	NT230	0	62	Control		2	0	0	0	0	0	0
1442	NT231	0	74	Control		0	0	0	0	1	1	2
1443	NT232	0	47	Control		0	0	0	0	0	1	1
1444	NT233	1	68	Control		1	0	1	0	1	0	1
1448	NT238	1	70	Control		0	1	0	0	1	1	1
1449	NT239	1	76	Control		1	1	0	0	0	2	0
1450	NT240	0	74	Control		1	0	1	0	2	1	2
1451	NT241	1	50	Control		1	0	1	0	0	0	1
1455	NT245	0	67	Control		0	2	1	0	1	1	2
1456	NT246	1	63	Control		0	2	0	0	1	1	1
1457	NT247	0	74	Control		1	0	0	0	2	1	0
1459	NT250	0	71	Control		0	2	0	0	1	1	1
1460	NT251	1	64	Control		1	1	0	0	1	2	2
1461	NT252	0	65	Control		1	1	0	0	0	1	1
1462	NT253	1	67	Control		1	1	0	0	1	1	0
1464	NT255	0	64	Control		1	0	1	0	1	2	0
1466	NT257	1	63	Control		1	0	0	0	1	1	0
1471	NT262	0	66	Control		1	1	1	0	0	0	1
1472	NT263	1	72	Control		0	0	0	0	1	0	1
1474	NT265	1	61	Control		1	1	1	0	0	0	0
1475	NT266	0	69	Control		1	1	1	0	0	0	1
1479	NT274	1	57	Control		0	0	1	0	2	2	0
1482	NT278	1	67	Control		0	1	0	0	0	1	0
1484	NT280	0	45	Control		0	0	0	0	0	1	2
1487	NT283	0	76	Control		1	1	0	0	0	1	1
1488	NT284	1	62	Control		0	1	1	0	0	1	2
1489	NT285	0	72	Control		1	0	2	0	0	1	2
1493	NT289	1	63	Control		0	1	1	0	1	0	0
1499	NT295	1	49	Control		2	0	0	0	0	1	1
1500	NT296	0	52	Control		1	0	1	0	2	2	1
1501	NT297	1	46	Control		0	0	1	0	2	2	2
1503	NT299	0	47	Control		0	1	1	0	0	1	0
1505	NT301	1	48	Control		0	1	1	0	0	1	1
1508	NT304	0	67	Control		1	1	0	0	2	0	2
1513	NT309	0	53	Control		1	0	1	0	1	1	2
1514	NT311	0	70	Control		1	0	1	0	2	0	1
1515	NT312	0	48	Control		1	0	1	0	0	1	1
1517	NT314	0	76	Control		2	0	2	0	0	2	1
1520	NT317	0	70	Control		1	0	1	0	0	0	1
1521	NT318	0	71	Control		1	0	0	0	0	0	2
1522	NT319	0	73	Control		0	0	0	0	0	1	2
1523	NT320	0	67	Control		1	0	0	0	0	1	0
1539	NT337	1	62	Control		0	0	1	0	0	0	0
1540	NT338	1	62	Control		0	1	0	0	0	0	1
1541	NT339	1	78	Control		0	0	1	0	0	2	1
1542	NT340	1	53	Control		0	1	0	0	2	1	0
1543	NT341	1	53	Control		2	0	1	0	1	1	1
1544	NT342	1	73	Control		1	0	2	0	0	0	1
1545	NT343	1	69	Control		0	0	0	0	1	1	0
1546	NT344	1	58	Control		1	0	0	0	2	0	2
1547	NT345	1	66	Control		1	1	0	0	1	0	0
1548	NT346	1	60	Control		0	1	0	0	0	0	0
1549	NT347	1	71	Control		0	2	1	0	1	0	0
1551	NT349	1	69	Control		0	0	1	0	0	1	0
1552	NT350	1	80	Control		1	0	1	0	0	0	2
1555	NT354	1	53	Control		0	2	1	0	1	1	1
1556	NT355	1	66	Control		0	0	0	0	1	1	1
1558	NT357	1	50	Control		0	2	1	0	0	1	1
1562	NT361	1	62	Control		1	0	0	0	2	1	1
1563	NT364	1	66	Control		0	1	1	0	1	1	1
1667	EFB104	1	62	Control		0	1	1	0	1	0	0
1705	EFB516	1	64	Control		0	0	0	0	0	1	1
1715	EFB151	1	66	Control		1	1	2	0	1	0	0
1720	EFB156	1	73	Control		1	0	1	0	2	0	2
1722	EFB159	1	70	Control		0	0	1	0	0	0	0
1726	EFB164	1	67	Control		0	2	1	0	1	1	1
1730	EFB169	1	62	Control		0	0	1	0	0	1	0
1734	EFB176	1	66	Control		0	0	0	0	0	2	1
1736	EFB178	1	62	Control		0	2	0	0	1	1	2
1737	EFB179	1	65	Control		0	0	0	0	1	1	1
1749	EFB192	1	66	Control		2	0	0	0	1	1	2
1750	EFB193	1	77	Control		1	0	0	0	0	0	1
1752	EFB195	1	64	Control		1	0	0	0	0	0	0
1753	EFB196	1	66	Control		1	1	1	0	0	2	1
1755	EFB198	1	71	Control		0	0	1	0	0	0	1
1756	EFB199	1	75	Control		0	0	1	0	0	1	0
1761	EFB207	1	69	Control		0	0	1	0	1	0	1
1764	EFB211	1	66	Control		0	1	1	0	2	1	1
1765	EFB212	1	80	Control		1	1	1	0	2	1	1
1799	EFC061	1	64	Control		0	2	0	0	1	1	2
1801	EFC063	1	69	Control		1	0	1	0	0	0	0
1817	EFC002	1	56	Control		1	0	0	0	1	0	1
1818	EFC004	1	53	Control		0	0	1	0	1	0	0
1819	EFC006	1	60	Control		1	1	0	0	0	0	1
1820	EFC007	1	62	Control		0	2	1	0	0	0	1
1821	EFC009	1	56	Control		0	0	1	0	2	0	1
1822	EFC010	1	54	Control		0	0	0	0	0	0	2
1823	EFC011	1	43	Control		1	0	1	0	1	1	1
1824	EFC012	1	55	Control		1	0	0	0	2	2	1
1825	EFC013	1	54	Control		0	2	0	0	1	1	1
1826	EFC014	1	45	Control		1	0	1	0	1	0	1
1827	EFC015	1	58	Control		0	0	1	0	1	1	0
1828	EFC016	1	55	Control		0	2	0	0	0	1	2
1829	EFC017	1	57	Control		2	0	0	0	1	0	1
1830	EFC018	1	60	Control		0	1	0	0	2	2	1
1831	EFC019	1	55	Control		1	0	0	0	1	2	0
1832	EFC020	1	55	Control		1	1	0	0	0	0	1
1833	EFC021	1	62	Control		0	2	1	0	0	1	0
1834	EFC022	1	46	Control		0	1	1	0	0	1	2
1835	EFC023	1	59	Control		0	1	0	0	0	0	1
1836	EFC024	1	61	Control		0	1	0	0	1	1	0
1837	EFC025	1	50	Control		0	0	1	0	0	0	0
1838	EFC026	1	60	Control		0	0	1	0	0	1	1
1839	EFC027	1	54	Control		0	2	1	0	1	1	2
1840	EFC028	1	55	Control		2	0	1	0	0	1	0
1841	EFC030	1	49	Control		1	1	0	0	0	1	1
1842	EFC042	1	62	Control		1	0	0	0	2	0	2
1843	GW01	1	55	Control		1	0	1	0	1	0	1
1845	GW03	1	55	Control		1	1	1	0	1	0	0
1846	GW04	1	72	Control		0	1	1	0	0	0	0
1847	GW05	0	57	Control		1	0	2	0	0	2	1
1850	GW08	0	51	Control		1	1	1	0	0	1	0
1851	GW09	0	59	Control		0	1	0	0	0	2	0
1853	GW11	0	47	Control		0	0	1	0	0	1	1
1855	GW13	0	53	Control		0	1	1	0	0	0	1
1857	GW15	1	66	Control		0	0	1	0	2	1	0
1858	GW16	0	55	Control		1	0	1	0	1	2	1
1860	GW18	1	71	Control		0	1	1	0	1	0	0
1861	GW19	0	59	Control		1	0	0	0	0	0	2
1862	GW20	0	54	Control		1	1	0	0	0	1	1
1863	GW21	0	54	Control		0	0	1	0	0	1	1
1865	GW23	1	48	Control		0	2	1	0	1	1	2
1866	GW24	1	56	Control		0	0	0	0	1	2	1
1869	GW27	0	58	Control		0	0	0	0	0	2	0
1871	GW29	0	50	Control		1	0	1	0	0	0	1
1872	GW30	0	64	Control		0	1	0	0	1	0	1
1873	GW31	1	46	Control		0	1	0	0	1	2	1
1874	GW32	1	51	Control		0	1	1	0	0	1	2
1875	GW33	0	51	Control		1	0	0	0	2	2	1
1877	GW35	1	50	Control		0	1	1	0	0	1	1
1878	GW36	0	47	Control		0	0	1	0	0	2	2
1881	GW39	0	74	Control		0	1	0	0	1	0	2
1882	GW40	1	50	Control		1	0	0	0	0	0	0
1884	GW42	1	67	Control		0	0	0	0	1	1	1
1885	GW43	1	52	Control		0	1	1	0	1	0	1
1887	GW45	1	47	Control		0	0	0	0	0	1	1
1889	GW47	1	54	Control		0	1	1	0	1	2	2
1890	GW48	1	58	Control		1	0	1	0	0	1	1
1893	GW51	1	76	Control		0	1	2	0	0	1	1
1894	GW52	0	60	Control		1	1	1	0	0	1	2
1895	GW53	0	73	Control		0	0	1	0	0	1	1
1896	GW54	0	54	Control		0	1	1	0	1	2	1
1897	GW55	1	47	Control		1	0	0	0	0	2	1
1898	GW56	1	51	Control		0	0	1	0	0	0	2
1899	GW57	0	52	Control		0	0	0	0	0	0	1
1900	GW58	1	55	Control		1	1	1	0	0	1	2
1906	GW64	0	51	Control		0	2	1	0	1	1	2
1910	GW68	1	76	Control		1	0	0	0	0	1	1
1911	GW69	1	53	Control		0	1	1	0	0	1	1
1912	GW70	0	48	Control		0	1	1	0	1	1	1
1913	GW71	1	43	Control		1	1	1	0	1	1	1
1914	GW72	0	58	Control		0	2	0	0	1	2	1
1915	GW73	1	49	Control		1	1	0	0	1	1	2
1917	GW75	1	39	Control		1	1	1	0	1	1	1
1920	GW78	1	56	Control		0	1	1	0	0	0	1
1921	GW79	1	67	Control		0	0	1	0	0	0	1
1923	GW81	0	77	Control		1	1	1	0	1	0	2
1924	GW82	1	69	Control		1	0	1	0	0	1	1
1925	GW83	1	59	Control		1	1	1	0	0	0	1
1926	GW84	1	67	Control		0	1	0	0	0	0	0
1927	GW85	1	73	Control		1	0	1	0	0	1	2
1928	GW86	0	69	Control		0	0	0	0	0	1	0
1929	GW87	1	47	Control		1	1	1	0	1	1	1
1934	GW92	1	45	Control		0	0	0	0	2	0	1
1935	GW93	0	54	Control		0	1	0	0	1	0	2
1936	GW94	1	74	Control		0	1	0	0	0	2	1
1937	GW95	1	53	Control		1	1	0	0	2	1	0
2197	SM001	0	51	Control		1	1	0	0	0	0	2
2200	SM023	0	50	Control		0	2	2	0	0	1	1
2201	SM028	0	47	Control		0	1	1	0	2	1	1
2202	SM033	0	47	Control		0	0	0	0	0	0	2
2205	SM045	0	53	Control		0	0	1	0	1	1	2
2207	SM058	0	54	Control		0	1	1	0	0	1	2
2209	SM064	0	47	Control		0	1	1	0	0	1	1
2212	MA001	1	58	Control		1	0	0	0	1	1	1
2213	MA002	1	76	Control		1	0	1	0	1	0	1
2215	MA005	1	62	Control		0	2	1	0	2	0	2
2216	MA006	1	86	Control		0	1	0	0	1	1	2
2217	MA007	0	69	Control		0	1	1	0	1	1	2
2218	MA009	1	59	Control		1	0	1	0	1	1	1
2219	MA010	0	58	Control		1	0	1	0	1	2	2
2220	MA011	1	71	Control		1	0	1	0	0	0	1
2221	MA012	1	79	Control		0	1	0	0	1	2	1
2222	MA014	0	80	Control		1	1	0	0	0	1	0
2223	MA015	1	70	Control		0	0	0	0	0	1	1
2224	MA016	1	48	Control		0	1	1	0	0	1	2
2225	MA017	1	72	Control		1	0	0	0	0	1	1
2226	MA018	1	47	Control		0	1	0	0	1	0	1
2228	AH005	1	49	Control		1	0	0	0	1		1
2229	AH006	1	60	Control		1	0	1	0	1	0	1
2230	AH009	0	70	Control		0	0	0	0	2	2	2
2231	AH010	0	72	Control		0	1	1	0	0	2	0
2236	AH016	0	48	Control		1	0	2	0	1	1	2
2237	AH017	1	56	Control		2	0	1	0	0	0	1
2238	AH018	0	60	Control		0	0	0	0	1	0	1
2239	AH019	0	59	Control		1	1	0	0	0	1	1
2240	AH020	1	55	Control		0	0	1	0	0	1	0
2241	AH023	1	49	Control		0	1	1	0	1	2	1
2242	AH024	0	60	Control		0	0	2	0	1	0	2
2243	AH027	1	63	Control		1	0	0	0	0	1	0
2245	AH029	1	58	Control		0	1	1	0	2	1	0
2246	AH030	1	61	Control		0	0	1	0	1	2	2
2247	AH031	0	48	Control		0	1	0	0	1	0	2
2248	AH034	1	37	Control		0	0	1	0	1	1	2
2249	AH036	0	42	Control		0	0	1	0	0	1	1
2253	AH046	1	51	Control		1	0	0	0	0	0	1
2254	AH047	0	54	Control		1	0	1	0	0	1	0
2255	AH048	0	61	Control		1	0	0	0	1	1	1
2257	AH051	0	61	Control		1	1	2	0	1	1	1
2258	AH056	0	58	Control		0	0	0	0	1	1	0
2260	AH060	1	51	Control		0	1	0	0	0	0	0
2261	AH063	1	60	Control		0	2	2	0	0	2	1
2263	AH066	1	59	Control		2	0	0	0	1	1	0
2264	NT368	1	60	Control		0	1	1	0	0	0	0
2265	NT370	0	72	Control		0	1	0	0	0	1	2
2266	NT373	0	48	Control		0	1	0	0	0	2	2
2267	NT375	1	63	Control		2	0	2	0	1	1	2
2268	NT383	1	62	Control		0	0	1	0	0	0	1
2269	P271	1	47	Control		1	0	0	0	2	0	0
2270	P288	1	56	Control		1	0	1	0	0	2	2
2577	AKO001	1	55	Control		1	0	1	0	0	2	2
2578	AKO002	0	45	Control		1	1	0	0	2	2	1
2579	AKO003	1	67	Control		0	1	2	0	1	1	1
2580	AKO004	0	68	Control		1	0	0	0	0	2	1
2581	AKO005	1	58	Control		0	1	0	0	2	1	1
2582	AKO006	0	62	Control		0	1	1	0	1	1	2
2583	AKO007	1	68	Control		1	1	0	0	1	0	1
2584	AKO008	1	66	Control		0	1	0	0	1	1	0
2585	AKO009	0	67	Control		0	0	1	0	2	1	2
2586	AKO010	0	71	Control		2	0	0	0	1	1	1
2587	AKO011	0	65	Control		1	1	1	0	0	1	1
2588	AKO012	0	65	Control		0	1	1	0	0	1	0
2589	AKO013	0	59	Control		0	2	1	0	1	1	1
2590	AKO014	1	65	Control		0	0	0	0	0	0	0
2591	AKO015	1	57	Control		0	0	0	0	0	1	1
2592	AKO016	0	65	Control		1	0	0	0	0	1	2
2593	AKO017	0	62	Control		2	0	1	0	1	0	1
2594	AKO018	0	61	Control		1	1	2	0	1	0	1
2595	AKO019	0	66	Control		1	1	0	0	1	2	1
2596	AKO020	1	53	Control		0	2	2	0	1	1	2
2597	AKO021	1	68	Control		1	0	1	0	0	0	1
2598	AKO022	1	53	Control		0	1	0	0	1	0	2
2599	AKO023	1	63	Control		1	1	1	0	0	1	0
2600	AKO024	1	57	Control		1	0	1	0	0	0	1
2601	AKO025	1	78	Control		0	1	1	0	0	0	2
2602	AKO026	1	60	Control		1	0	1	0	0	1	0
2603	AKO027	1	62	Control		0	1	1	0	1	2	0
2604	AKO028	1	55	Control		1	0	2	0	1	1	0
2605	AKO029	1	63	Control		0	1	0	0	0	0	0
2606	AKO030	1	59	Control		0	0	0	0	0	1	1
2607	AKO031	1	64	Control		1	1	1	0	0	1	2
2608	AKO032	1	67	Control		0	0	1	0	0	2	0
2609	AKO033	1	65	Control		0	0	1	0	0	0	0
